# Supplementary material for: Production of propane and propene via carbon capture utilisation: comparison of its environmental and economic performance against conventional production methods
Source: Royal Society of Chemistry journal article supplement (doi:10.1039/d2gc04721g), 2023-01-01
Supplement: d2gc04721g1.pdf [file d2gc04721g1.pdf]

# Production of propane and propene via carbon capture utilisation: comparison of its environmental and economic performance against conventional production methods

Alexander Payne<sup>1</sup>, Guillermo Garcia-Garcia<sup>1</sup>, Peter Styring<sup>1</sup>

<sup>1</sup>UK Centre for CO<sub>2</sub> Utilization, Department of Chemical and Biological Engineering, The University of Sheffield, Sir Robert Hadfield Building, Sheffield, S1 3JD UK

## Supplementary Information

### 1 Conventional production of propane

Propane is a colourless and odourless gaseous aliphatic hydrocarbon with chemical formula C<sub>3</sub>H<sub>8</sub>. Propane is normally compressed and stored as a liquid due to its boiling point of -42.5 °C (Wypych and Wypych, 2019). Propane's uses include space and water heating, meeting grid CV (constant volume heat capacity) when injecting biomethane into the gas grid and as a fuel in vehicles. However, almost half of the propane consumed by industry is used to manufacture plastic (Bird Fuels, 2020).

Propane has two main origins: 60% is recovered from natural gas extraction and 40% is from refining crude oil (Figure 1). A small fraction is also made renewably from waste feedstocks (WLPGA, 2020). In 2021, global production of propane was estimated at 164.3 million tons (IMARC, 2022). The greatest producers of propane are the U.S., Saudi Arabia and Russia (Britannica, 2019).

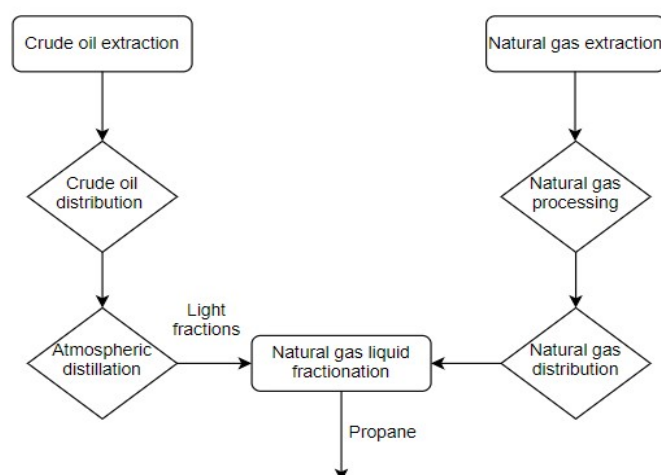

Figure 1. Overall flow diagram for propane production

Natural gas processing involves the removal of the impurities that are non-hydrocarbons and the natural gas liquids (NGLs), which are associated hydrocarbons. The “wetness” indicates the quantity of NGLs contained within it (WLPGA, 2020). Water vapour or “associated water” can be present and is removed by dehydration. The production of propane through NGL fractionation is achieved by separating out all the hydrocarbons present in natural gas. The

most common technologies used in recovery are refrigeration, cryogenic recovery, oil absorption and dry-bed adsorption (Speight, 2007).

Following the separation of the bulk NGLs, the different components are separated through fractionation. This consists of the following distillation columns (Maverick Engineering, 2020): de-ethaniser, de-propaniser, and de-butaniser, for ethane, propane and butane removal, respectively. This leaves pentane and heavier hydrocarbons.

The other common method of conventional propane production is via petroleum refining. Crude oil is a mixture of hydrocarbons that can be separated by distillation. The lighter, more volatile hydrocarbons such as propane are recovered at the top of the atmospheric distillation column (World Petroleum Council, 2020).

## 2 Conventional production of propene

Propene (also known as propylene) is a colourless gaseous aliphatic hydrocarbon that has a faint petroleum odour with formula  $C_3H_6$  (PubChem, 2020). Propene is the second largest chemical produced globally by volume (IHS Markit, 2019) with a global production capacity of 133.18 million tons in 2020 (Statista, 2023). Propene is a key raw material to produce organic chemicals such as polypropylene, acrylonitrile, propylene oxide and oxo alcohols (IHS Markit, 2019). Acrylonitrile is used in the manufacture of acrylics such as Perspex and propylene oxide is used to produce propylene glycol. Polypropylene accounted for around two-thirds of the consumption of propene in 2017 (Wang, 2021), which is used for packaging and as plastic parts in various industries due to its high melting point, low density, stiffness, and strength (Moretti, 2020).

Propene production typically centres around steam cracking (SC) of naphtha. However, there has been a shift towards ethane and lighter feedstocks that yield less propene (PRNewswire, 2020) as naphtha use is discouraged due to the high price of crude oil and the emergence of shale-based ethane feedstocks (Dean, 2013). To meet this demand, “on-purpose” propene production technologies have increased in prevalence, such as propane dehydrogenation, methanol to propylene, high severity fluidised catalytic cracking and coal to propene (PRNewswire, 2020). For instance, the contribution of propane dehydrogenation to the global propene production will increase from 22% in 2018 to 32% in 2027 (Marsh and Wery, 2019).

SC to produce propene as a by-product of ethylene production accounts for 47% of global installed capacity in 2017, refinery operations contributed 32% and on-purpose technologies contributed the remaining 21% (Nexant, 2018). These are discussed below. The two main options to produce propene from crude oil are represented in Figure 2.

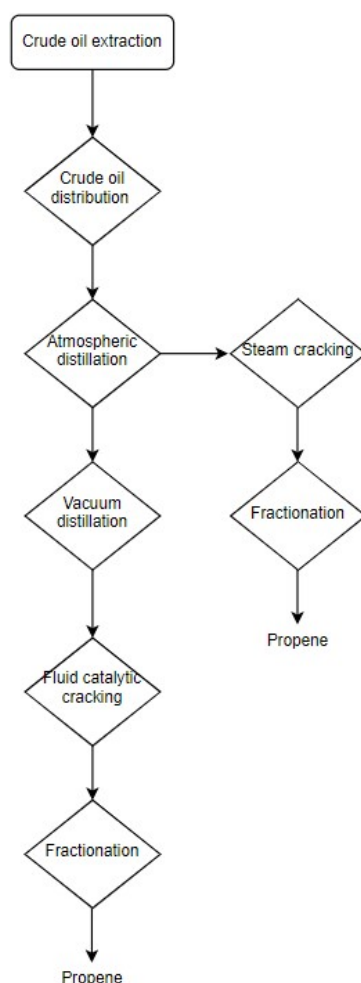

Figure 2. Overall flow diagram for propene production

## 2.1 Steam cracking (SC)

The prominent feedstocks for propene production from SC are liquid feedstocks such as naphtha. With the rise of NGLs from shale gas, propane, ethane and butane can also be used as reactant gases (Speight, 2011).

The feedstock used has a direct impact on the yield of products. SC of propane produces the highest yield of propene. However, naphtha, which is a more abundant feedstock in a refinery, produces a similar yield.

SC thermally decomposes saturated hydrocarbons with steam into shorter chain, unsaturated alkenes (i.e. olefins) in the absence of oxygen. The feedstocks are preheated, vaporised, mixed with steam and heated to 1050-1150 K in a tubular reactor to produce the olefins. Once the cracking temperature is reached, the product gas is immediately quenched with a colder fluid stream as product yield is dependent on furnace residence time, cracking temperature, hydrocarbon-to-steam ratio, and feed composition. Lower temperatures favour the production of propene (Kutz, 2017).

## 2.2 Fluid catalytic cracking (FCC)

The feedstock for FCC is usually vacuum gas oil and vacuum residue. When crude oil first enters atmospheric distillation, any of the heavy fractions that cannot be fractionated further are sent to vacuum distillation that produce the gas oil and residue. This is necessary because higher temperatures would cause thermal cracking (Corma et al., 2017).

FCC uses fine powdered catalysts such as zeolite, which are suspended in a flow of rising hydrocarbon feed. The feed of gas oil or residue is fed into the reactor, which vaporises due to heat transfer from the catalyst. The residence time within the reactor is between 2 and 5 seconds to promote selectivity of desirable products and prevent aromatisation and thermal cracking into by-products such as coke and fuel gas (Corma et al., 2017). Several reactions take place, such as isomerisation, cracking, alkylation and dehydrogenation.

### 2.3 Propane dehydrogenation

Propane dehydrogenation is highly endothermic and is carried out at high temperature and low pressure. There are only two commercially proven technologies for this process, known as CATOFIN, a fixed-bed reactor, and OLEFLEX, a moving bed reactor (Maddah, 2018).

The CATOFIN process passes propane over a fixed-bed of chromium-alumina catalyst. The process is highly endothermic, and the high purity propane is preheated in a charge heater to between 540 to 760 °C before entering the reactor for a residence time of 7 to 15 minutes. The reactor effluent is cooled to reject light ends before being compressed and separated in a flash drum into light products such as ethane and liquids such as propene (Maddah, 2018).

The OLEFLEX plant utilises a slowly moving bed of catalyst that circulates through the reactors before being regenerated after 5 to 10 days of operation. OLEFLEX uses a series of radial flow reactors with inter-stage heaters to supply continuous heat. The product gas is cooled, compressed, dried, and separated cryogenically. A by-product of the process is high purity hydrogen that can be sold to consumers to further improve the economics of the plant.

## 3 Carbon Capture and Utilisation

Carbon Capture and Utilisation (CCU) is a decarbonisation method that aims to reduce fossil resource depletion and greenhouse gas emissions by utilising captured carbon dioxide as a feedstock (Von der Assen et al., 2013). CO<sub>2</sub> can be transformed into chemicals, materials and transportation fuels (Al-Mamoori et al., 2017). This section analyses the different processes involved in this route.

### 3.1 Carbon capture

There are three main methods to capture CO<sub>2</sub> industrially:

- Post-combustion capture involves the use of a solvent that has a high affinity for CO<sub>2</sub> in a flue gas stream and is therefore contacted with the solvent in an absorber column. The rich solvent is regenerated by heating in a stripper column (Haszeldine, 2009). The industrial benchmark solvent is monoethanolamine (MEA) due to its relatively low cost and high capture rate (Khoo et al., 2020). However, piperazine (PZ) is an alternative solvent that is gaining momentum as it has a higher cyclic capacity which results in a lower circulation flowrate, a lower regeneration energy (Nwaoha, 2017) and lower corrosivity compared to MEA (Zheng, 2014).
- Oxyfuel combustion capture uses the process of cryogenic distillation in an air separation unit to burn fuel in power plants in the presence of pure oxygen combined with recycled flue gas to control combustion temperatures (Haszeldine, 2009).
- Pre-combustion capture involves reacting a fuel with steam and oxygen under high temperature and pressure to form syngas (NETL, 2020).

Sources for CO<sub>2</sub> are mostly large point-sources such as fossil fuel power plants, which emit 78% of all CO<sub>2</sub> from point sources globally (Von der Assen et al., 2013). The energy required for carbon capture is determined by the effectiveness of the solvent and the concentration of

CO<sub>2</sub> in the flue gas. Example concentrations and price of capture for such point-sources are detailed in Table 1.

Table 1 Table of different large point-sources of carbon dioxide, their concentrations (IPCC, 2005) and costs (Dieterich et al., 2020)

| Source of CO <sub>2</sub>      | Concentration of CO <sub>2</sub> in gas stream by vol% | Cost (€/t CO <sub>2</sub> ) |
|--------------------------------|--------------------------------------------------------|-----------------------------|
| Direct air capture             | 412 ppm                                                | 222-268                     |
| Coal (power generation)        | 12 to 15                                               | 31-49                       |
| Natural gas (power generation) | 7 to 10                                                | 47-90                       |
| Fuel oil (power generation)    | 8                                                      | N/A                         |
| Cement production              | 20                                                     | 58-87                       |
| Integrated steel mills         | 15                                                     | 70-73                       |
| Ammonia process                | 100                                                    | N/A                         |
| Ethylene oxide production      | 100                                                    | N/A                         |

### 3.2 Carbon dioxide utilisation

The utilisation of CO<sub>2</sub> can be directly in applications such as enhanced oil recovery or conversion into products. Conversion can be split into carboxylation and reduction reactions, where the former produces carboxylic acids, whereas the latter involve the cleavage of carbonyl bonds to form products such as methane and methanol (Von der Assen et al., 2013). CO<sub>2</sub> has a high thermodynamic stability and kinetic inertness (Hong, 2018), so reduction reactions are inherently energy intensive, which is potentially disadvantageous (Von der Assen et al., 2013). Therefore, to have a net negative carbon saving relative to fossil fuels, the energy source must be renewable. To date, there have not been any analyses published comparing both environmentally and economically the conventional production of propane and propene versus methods that utilise captured CO<sub>2</sub> as a feedstock.

### 3.3 Methanol to propene

Methanol is the simplest carbon-based fuel (Patterson et al., 2019) and considered one of the most important organic feedstocks as it can be used to form products such as formaldehyde, acetic acid and dimethyl ether (DME) (Guil-López et al., 2019). The synthesis of methanol industrially is predominantly from syngas produced from steam reforming of fossil fuels such as natural gas. However, the synthesis of methanol from carbon dioxide is far less exothermic and Karamé (2018) argued that the most straightforward method for methanol production is from the catalytic hydrogenation of CO<sub>2</sub> (Eq.1), with heterogenous catalysis being the preferred route industrially:

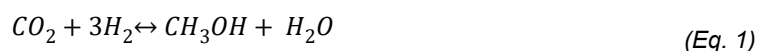

Due to the lower exothermicity of methanol synthesis from CO<sub>2</sub> a tube-cooled reactor can be used over a boiler water reactor type. The catalyst is commonly Cu-ZnO based (Guil-López et al., 2019).

Al-Mamoori et al. (2017) proposed the inclusion of the dry reforming of methane as an important pathway to produce methanol and other liquid fuels utilising the Fischer-Tropsch (FT) process.

An analytical review by Garcia-Garcia et al. (2021) found numerous CO<sub>2</sub> emission intensities for hydrogenation of CO<sub>2</sub> using Cu/ZnO/Al<sub>2</sub>O<sub>3</sub> as summarised in Table 2.

Table 2. Different emission intensities of hydrogenation of carbon dioxide reported (Garcia-Garcia et al., 2021)

| System boundary | Hydrogen and electricity source | CO <sub>2</sub> emissions |
|-----------------|---------------------------------|---------------------------|
|-----------------|---------------------------------|---------------------------|

|                                                                                                                                              |                                                                                                                                                                                                         |                                                     |
|----------------------------------------------------------------------------------------------------------------------------------------------|---------------------------------------------------------------------------------------------------------------------------------------------------------------------------------------------------------|-----------------------------------------------------|
| Gate-to-gate, excluding hydrogen generation and carbon capture                                                                               | Hydrogen generation not included electricity use (for compression and pumping) from conventional pulverised coal power plant; 0.17 MWh t <sup>-1</sup> for electricity requirements to produce methanol | 0.13 t CO <sub>2</sub> eq t <sup>-1</sup> methanol  |
| Emissions from flue gases, steam and electricity generation, hydrogen and oxygen production and the natural gas supply chain were considered | Electricity from natural gas, hydrogen from steam reforming                                                                                                                                             | 2.983 t CO <sub>2</sub> eq t <sup>-1</sup> methanol |
|                                                                                                                                              | Electricity from natural gas, hydrogen from wind powered electrolysis                                                                                                                                   | 0.657 t CO <sub>2</sub> eq t <sup>-1</sup> methanol |
|                                                                                                                                              | Electricity from natural gas, hydrogen from solar powered electrolysis                                                                                                                                  | 1.508 t CO <sub>2</sub> eq t <sup>-1</sup> methanol |

Garcia-Garcia et al. (2021) emphasised the lack of studies that include not only emissions from hydrogen generation and carbon capture, but also the utilisation of CO<sub>2</sub> as a feedstock (as those shown in Table 2). Furthermore, the importance of the energy source, particularly for hydrogen generation, was highlighted as a key contributor to the overall environmental impact. Electricity requirements and how they are sourced (e.g. renewable vs fossil) are key factors in determining the environmental burden of the process.

The oil crisis in 1973 generated the first interest for methanol to olefins (MTO) and methanol to gasoline (Boltz et al., 2014). The MTO reaction involves the reversible dehydration of methanol to DME, before the conversion to light olefins (C<sub>2</sub> to C<sub>4</sub>). The light olefins can be further converted into products such as methane, ethane, propane, heavier hydrocarbons and aromatics (Dimian et al., 2018).

The oligomerisation reaction occurs in a fluidised bed reactor at 350-500 °C, 2-3 bar and utilises a catalyst, usually SAPO-34, chosen for its activity and robustness (Dimian et al., 2018). To recover propene from the process, the components of the product gas, a mixture of olefinic and paraffinic components up to C<sub>5</sub>, are separated out cryogenically in a front-end de-ethaniser set up (Keller et al., 2020). The yield of ethene and propene can be up to 40 wt.% each (Dimian et al., 2018). Vora et al. (1997) found that propene yield was 32 wt% when operating with SAPO-34 and at 450 °C, 1.5 bar.

Due to increasing demand for propene, a new process named methanol to propene (MTP) was developed. The process is characterised by the recycling of olefins to maximise propene selectivity (Boltz et al., 2014). Furthermore, while the MTO reaction utilises a fluidised bed reactor for efficient removal of reaction heat, the MTP uses a fixed-bed reactor. Although the MTO process can use crude methanol, it must be purified for MTP (Jasper and El-Halwagi, 2015).

Jasper and El-Halwagi (2015) simulated an MTO and MTP process and found that the direct CO<sub>2</sub> emissions were 20.9 and 16.1 t CO<sub>2</sub>/t propene respectively. Xiang et al. (2015) carried out an LCA of olefins production comparing SC of naphtha to MTO where the methanol was produced from natural gas and coal. Coal to olefins resulted in significantly higher GHG emissions than from natural gas and crude oil, which were roughly equivalent. No studies were found that considered the techno-economics and environmental aspects of an MTP process that utilises captured CO<sub>2</sub>.

Figure 3 shows the proposed production pathway for propene via CCU and subsequent MTP.

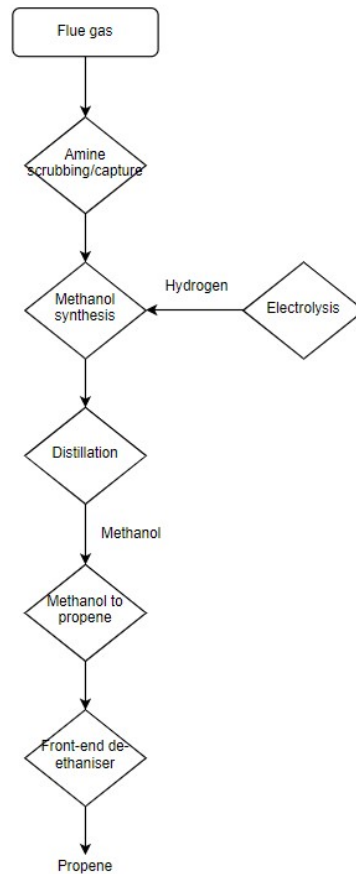

Figure 3. Simplified overview of CCU to produce propene

### 3.4 Propane

Al-Mamoori et al. (2017) stated there are two ways to convert CO<sub>2</sub> into liquid hydrocarbons. The conversion to methanol to produce propene (described in the previous section), has a low yield of paraffins. Therefore, the production of syngas from methane that is subsequently converted to long-chain hydrocarbons by the FT process is preferred for paraffins (Yao et al., 2020). The main products are paraffins, while olefins, oxygenates and aromatic compounds are produced with significantly lower yield (Dimitriou et al., 2015). The two main stages in this process are described in the following subsections.

#### 3.4.1 Bi-reforming of methane

Syngas is produced from the oxidation of methane, where CO<sub>2</sub> can be used as the oxidising agent in the dry methane reforming process (DRM) (Eq. 2) (Lavoie, 2014). Therefore, the process can be considered a route for carbon dioxide utilisation.

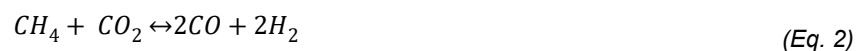

Gangadharan et al. (2012) found that DRM results in significant coke deposition (Boudouard reaction, Eq. 3), which can be drastically reduced when combined with steam methane reforming (SMR), formerly known as bi-reforming of methane (BRM). SMR is the most common process for syngas production (Er-Rbib et al., 2012) as it provides a source of hydrogen for ammonia and methanol synthesis (Oyama et al., 2012). Additionally, Oyama et al. (2012) claimed that previous research on DRM had failed to recognise the issue of the reverse water gas shift reaction (RWGS) reaction, which consumes hydrogen to produce water, as studies mostly operated at atmospheric pressure where water production is small.

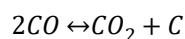

(Eq. 3)

Furthermore, Parsapur et al. (2020) and Er-Rbib et al. (2012) argued that the H<sub>2</sub>:CO ratio is a critical operating condition in FT processes for selectivity of fuels and DRM obtains a syngas with ratio 1:1, which is limited to direct applications such as acetic acid synthesis. Therefore, DRM should be combined with SMR to achieve a more desirable ratio of 1.7 to 2.4. The use of water electrolysis for H<sub>2</sub> addition may overcome this issue, however, it ignores operational issues of coke deposition if DRM was used.

Youngsub et al. (2012) found that when SMR was combined with DRM, a net reduction of 67% in CO<sub>2</sub> emissions was achieved compared to SMR alone to form syngas.

### 3.4.2 Fischer-Tropsch (FT)

The FT process is highly exothermic and converts syngas to hydrocarbons at elevated pressures and temperatures within the range of 200 to 350 °C (Guettel et al., 2008). The production of gasoline and linear low molecular mass olefins is achieved with iron-based catalysts and temperatures between 300-350 °C, however, selectivity for high molecular mass linear waxes is achieved at 200-240 °C with iron or cobalt catalysts (Dry, 2002). Due to the exothermic nature of the reactions and to prevent catalyst deactivation, FT uses multi-tubular, slurry or fluidised bed reactors (Dry, 2002).

Figure 4 shows the proposed production pathway for propane via FT and CCU.

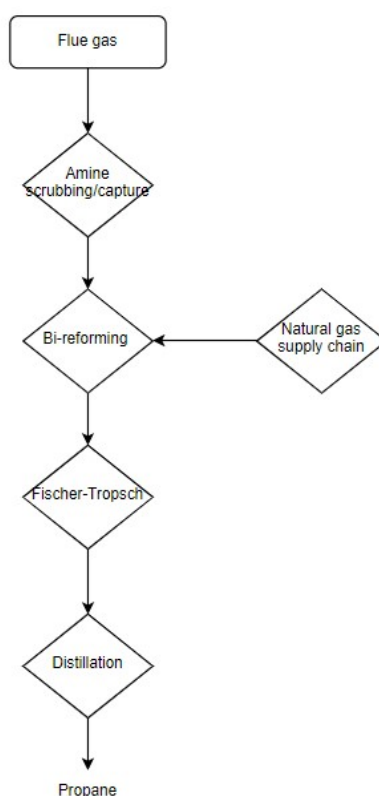

Figure 4. Simplified overview of CCU to produce propane

Reaction conditions such as pressure, temperature, H<sub>2</sub>/CO, catalyst and reaction time governs the selectivity of the distribution of products (Krylova, 2014). These reaction conditions influence the chain growth probability, denoted  $\alpha$  which varies between 0 and 1 (Kapteijn and Moulijn, 2020) and is a parameter used to evaluate selectivity where long paraffin yield



increases when  $\alpha$  is close to 1 (Kapteijn and Moulijn, 2020).  $\alpha$  relates to the catalyst surface where the adsorbed hydrocarbon species either desorbs, becomes hydrogenated or has another monomer added. Dry (2002) and Kapteijn and Moulijn (2020) have found that high  $H_2/CO$  ratio and high temperature decrease  $\alpha$  and therefore increase selectivity of propane. Additionally, Corsaro et al. (2014) found that selectivity of propane varies from less than 5% to almost 15% between 523 and 623 K. Furthermore, Liu et al. (2020) found that  $C_2$ - $C_4$  paraffin yield was highest (21-17.7 wt.%) when temperatures between 330 and 340 °C were used in combination with  $Fe_xO_y$  and  $Fe/\alpha-Al_2O_3$  catalysts.

Currently, there is a lack of studies that evaluate the environmental impacts of propane production from FT with syngas derived from bi-reforming of methane. Some cradle-to-grave analyses exist for biologically-derived syngas (biogas or biomass) or from coal and natural gas to fuels such as gasoline.

## 4 Overall environmental impacts to produce propane from crude oil refining

Table 3. Environmental impacts of processes involved to produce propane from crude oil refining

| Crude extraction                       | Original value | Unit                    | Value in common unit | Unit                        | Characterised value | Unit                           |
|----------------------------------------|----------------|-------------------------|----------------------|-----------------------------|---------------------|--------------------------------|
| Crude oil required                     | 16.30486       | kg crude oil/kg propane |                      |                             |                     |                                |
| <b>Flaring</b>                         | 0.00379885     | Nm <sup>3</sup> /kg OE  | 0.061939717          | Nm <sup>3</sup> /kg propane | 0.2623981           | kgCO <sub>2</sub> e/kg propane |
| Methane                                | 0.000707       | kg/Nm <sup>3</sup>      | 4.37914E-05          | kg/kg propane               | 0.0009196           | kgCO <sub>2</sub> e/kg propane |
| Carbon dioxide                         | 3.71           | kg/Nm <sup>3</sup>      | 0.229796352          | kg/kg propane               | 0.2297964           | kgCO <sub>2</sub> e/kg propane |
| Carbon monoxide                        | 0.001          | kg/Nm <sup>3</sup>      | 6.19397E-05          | kg/kg propane               |                     |                                |
| Non-methane volatile organic compounds | 0.000196       | kg/Nm <sup>3</sup>      | 1.21402E-05          | kg/kg propane               |                     |                                |
| Nitrogen oxides                        | 0.00163        | kg/Nm <sup>3</sup>      | 0.000100962          | kg/kg propane               | 0.0312981           | kgCO <sub>2</sub> e/kg propane |
| Dinitrogen monoxide                    | 0.00002        | kg/Nm <sup>3</sup>      | 1.23879E-06          | kg/kg propane               | 0.000384            | kgCO <sub>2</sub> e/kg propane |
| Particulates <2.5um                    | 0.00054        | kg/Nm <sup>3</sup>      | 3.34474E-05          | kg/kg propane               |                     |                                |
| Sulfur dioxide                         | 0.17           | kg/Nm <sup>3</sup>      | 0.010529752          | kg/kg propane               |                     |                                |
| Mercury                                | 0.0000002      | kg/Nm <sup>3</sup>      | 1.23879E-08          | kg/kg propane               |                     |                                |
| Radon-222                              | 0.4            | kg/Nm <sup>3</sup>      | 0.024775887          | kg/kg propane               |                     |                                |
| <b>Venting</b>                         | 0.0007         | Nm <sup>3</sup> /kg OE  | 0.011413402          | Nm <sup>3</sup> /kg propane | 0.1403734           | kgCO <sub>2</sub> e/kg propane |
| Methane                                | 5.85E-01       | kg/Nm <sup>3</sup>      | 0.00667684           | kg/kg propane               | 0.1402136           | kgCO <sub>2</sub> e/kg propane |
| Carbon dioxide                         | 1.40E-02       | kg/Nm <sup>3</sup>      | 0.000159788          | kg/kg propane               | 0.0001598           | kgCO <sub>2</sub> e/kg propane |
| Helium                                 | 1.00E-03       | kg/Nm <sup>3</sup>      | 1.14134E-05          | kg/kg propane               |                     |                                |
| Non-methane volatile organic compounds | 2.71E-01       | kg/Nm <sup>3</sup>      | 0.003093032          | kg/kg propane               |                     |                                |
| Mercury                                | 1.50E-08       | kg/Nm <sup>3</sup>      | 1.71201E-10          | kg/kg propane               |                     |                                |
| Radon-222                              | 1.00E-01       | kBq/Nm <sup>3</sup>     | 0.00114134           | kg/kg propane               |                     |                                |
| <b>Water Usage &amp; disposal</b>      |                |                         |                      |                             |                     |                                |
| Fresh water usage                      | 0.109          | kg/kg OE                |                      |                             | 1.7772297           | kg/kg propane                  |
| Water disposal intensity (onshore)     | 1.06           | kg/kg OE                |                      |                             | 17.283152           | kg/kg propane                  |

|                                                 |             |                                        |             |                        |           |                                |
|-------------------------------------------------|-------------|----------------------------------------|-------------|------------------------|-----------|--------------------------------|
| Average oil concentration (produced water)      | 3.9         | mg/l                                   |             |                        | 67.404291 | mg/kg propane                  |
| <b>Emissions of energy usage for extraction</b> |             |                                        |             |                        | 0.3513403 | kgCO <sub>2</sub> e/kg propane |
| Diesel burned in generator                      | 0.026       | MJ/kg                                  |             |                        |           |                                |
| NO <sub>x</sub>                                 | 0.02123816  | g/kg crude oil                         | 0.346285222 | g/kg propane           | 0.1073484 | kgCO <sub>2</sub> e/kg propane |
| PM                                              | 0.001117798 | g/kg crude oil                         | 0.018225538 | g/kg propane           |           |                                |
| CO <sub>2</sub>                                 | 1.844366509 | g/kg crude oil                         | 30.07213772 | g/kg propane           | 0.0300721 | kgCO <sub>2</sub> e/kg propane |
| SO <sub>x</sub>                                 | 1.69346E-05 | g/kg crude oil                         | 0.000276117 | g/kg propane           |           |                                |
| Electricity from grid                           | 0.032       | kWh/kg                                 | 0.41        | kgCO <sub>2</sub> /kWh | 0.2139198 | kgCO <sub>2</sub> e/kg propane |
| <b>Crude distribution</b>                       |             |                                        |             |                        |           |                                |
| Pipeline                                        |             |                                        |             |                        | 0.3426169 | kgCO <sub>2</sub> e/kg propane |
| CO <sub>2</sub>                                 | 2.81        | kg/bbl extracted                       | 336.8871809 | g/kg propane           | 0.3368872 | kgCO <sub>2</sub> e/kg propane |
| CH <sub>4</sub>                                 | 1.74E-03    | kg/bbl extracted                       | 2.08E-01    | g/kg propane           | 0.0043732 | kgCO <sub>2</sub> e/kg propane |
| N <sub>2</sub> O                                | 3.65E-05    | kg/bbl extracted                       | 0.004375937 | g/kg propane           | 0.0013565 | kgCO <sub>2</sub> e/kg propane |
| <b>Atmospheric distillation</b>                 |             |                                        |             |                        |           |                                |
| Atmospheric distillation                        |             |                                        |             |                        | 0.2650081 | kgCO <sub>2</sub> e/kg propane |
| Fuel use (refinery gas)                         | 1977.78     | kJ/kg propane                          |             |                        |           |                                |
| CO <sub>2</sub>                                 | 6.49E-05    | kg/kJ                                  | 1.28E-01    | kg/kg propane          | 1.28E-01  | kgCO <sub>2</sub> e/kg propane |
| CH <sub>4</sub>                                 | 1.27E-09    | kg/kJ                                  | 2.51E-06    | kg/kg propane          | 5.27E-05  | kgCO <sub>2</sub> e/kg propane |
| N <sub>2</sub> O                                | 6.16E-10    | kg/kJ                                  | 1.22E-06    | kg/kg propane          | 3.78E-04  | kgCO <sub>2</sub> e/kg propane |
| Electricity                                     | 184.2449    | kJ/kg propane                          |             |                        | 0.0209834 | kgCO <sub>2</sub> e/kg propane |
| Steam (refinery gas)                            | 1416.892    | kJ/kg propane                          |             |                        |           |                                |
| CO <sub>2</sub>                                 | 7.84E-05    | kg/kJ                                  | 1.11E-01    | kg/kg propane          | 1.11E-01  | kgCO <sub>2</sub> e/kg propane |
| CH <sub>4</sub>                                 | 1.25E-07    | kg/kJ                                  | 1.77E-04    | kg/kg propane          | 3.72E-03  | kgCO <sub>2</sub> e/kg propane |
| N <sub>2</sub> O                                | 9.85E-10    | kg/kJ                                  | 1.40E-06    | kg/kg propane          | 4.33E-04  | kgCO <sub>2</sub> e/kg propane |
| Water usage                                     | 0.513333333 | m <sup>3</sup> /m <sup>3</sup> propane |             |                        | 0.9753333 | kg/kg propane                  |
| <b>Natural gas liquid fractionation</b>         |             |                                        |             |                        |           |                                |
| Fractionation                                   |             |                                        |             |                        | 0.0911077 | kgCO <sub>2</sub> e/kg propane |
| CO <sub>2</sub>                                 | 5.33        | kg/bbl NGL                             | 0.063691824 | kg/kg NGL              | 0.0636918 | kgCO <sub>2</sub> e/kg propane |
| CH <sub>4</sub>                                 | 0.105       | kg/bbl NGL                             | 0.001254717 | kg/kg NGL              | 0.0263491 | kgCO <sub>2</sub> e/kg propane |
| N <sub>2</sub> O                                | 0.000288    | kg/bbl NGL                             | 3.44151E-06 | kg/kg NGL              | 0.0010669 | kgCO <sub>2</sub> e/kg propane |
| <b>Propane transportation</b>                   |             |                                        |             |                        |           |                                |
| Transportation                                  |             |                                        |             |                        | 0.0552893 | kgCO <sub>2</sub> e/kg propane |
| CO <sub>2</sub>                                 | 4.54        | kg/bbl NGL                             | 0.054252    | kg/kg NGL              | 0.054252  | kgCO <sub>2</sub> e/kg propane |
| CH <sub>4</sub>                                 | 2.81E-03    | kg/bbl NGL                             | 3.36E-05    | kg/kg NGL              | 7.06E-04  | kgCO <sub>2</sub> e/kg propane |

|                  |          |            |          |           |          |                                |
|------------------|----------|------------|----------|-----------|----------|--------------------------------|
| N <sub>2</sub> O | 8.93E-05 | kg/bbl NGL | 1.07E-06 | kg/kg NGL | 3.32E-04 | kgCO <sub>2</sub> e/kg propane |
|------------------|----------|------------|----------|-----------|----------|--------------------------------|

## 5 Environmental impacts of crude oil extraction

Table 4. Environmental impacts of crude oil extraction

| Source            | CO <sub>2</sub> | CH <sub>4</sub> | N <sub>2</sub> O | Unit                              | Notes                                                    | Year |
|-------------------|-----------------|-----------------|------------------|-----------------------------------|----------------------------------------------------------|------|
| NETL, 2008        | 0.203219        |                 |                  | kg CO <sub>2</sub> e/kg crude oil | World average, extraction (includes venting and flaring) | 2005 |
| Zhou et al., 2019 | 4.108622        | 0.0024315       | 1.2625E-05       | (g/ kg crude oil)                 | China, extraction and processing                         |      |

Table 5. Major crude oil producers and associated extraction GHG (NETL, 2008)

| Country      | Crude oil production (Mt/a) (ESU-Services, 2018) | GHG extraction (kg CO <sub>2</sub> e/bbl crude oil) (NETL, 2008) |
|--------------|--------------------------------------------------|------------------------------------------------------------------|
| Nigeria      | 103                                              | 128.6                                                            |
| Iraq         | 193                                              | 19.6                                                             |
| Mexico       | 120                                              | 38.4                                                             |
| Saudi-Arabia | 598                                              | 13.6                                                             |
| USA          | 556                                              | 24.5                                                             |

Table 6. Conversion of extraction emissions for a bbl of crude oil to per kg (NETL, 2008)

| Source     | Weighted average (kg CO <sub>2</sub> e/bbl crude oil) | Barrel of crude oil (kg) (Campbell, 2018) | Average (kg CO <sub>2</sub> e/kg crude oil) |
|------------|-------------------------------------------------------|-------------------------------------------|---------------------------------------------|
| NETL, 2008 | 27.638                                                | 136                                       | 0.203219                                    |

Table 7. Direct and indirect emissions for crude oil extraction (Zhou et al., 2019)

| Process                             | Indirect               |                        |                          | Direct                 |                        |                          | Total                  |                        |                          |
|-------------------------------------|------------------------|------------------------|--------------------------|------------------------|------------------------|--------------------------|------------------------|------------------------|--------------------------|
|                                     | CO <sub>2</sub> (g/MJ) | CH <sub>4</sub> (g/MJ) | N <sub>2</sub> O (mg/MJ) | CO <sub>2</sub> (g/MJ) | CH <sub>4</sub> (g/MJ) | N <sub>2</sub> O (mg/MJ) | CO <sub>2</sub> (g/MJ) | CH <sub>4</sub> (g/MJ) | N <sub>2</sub> O (mg/MJ) |
| Crude oil extraction and processing | 16                     | 0.05                   | 0.27                     | 71.867                 | 0.002                  | 0                        | 87.867                 | 0.052                  | 0.27                     |

Table 8. Total of emissions from Zhou et al. (2019) converted to per unit mass using (Norwegian Petroleum Directorate, 2020)

| CO <sub>2</sub> (g/kg crude oil) | CH <sub>4</sub> (g/ kg crude oil) | N <sub>2</sub> O (g/ kg crude oil) |
|----------------------------------|-----------------------------------|------------------------------------|
| 4.108622                         | 0.0024315                         | 1.2625E-05                         |

Table 9. Venting and flaring emissions

| Crude extraction venting |       |      |        | Crude extraction flaring |       |      |        |
|--------------------------|-------|------|--------|--------------------------|-------|------|--------|
| Process                  | Value | Unit | Source | Process                  | Value | Unit | Source |

|                          |          |                                |                     |                          |         |                                |                     |
|--------------------------|----------|--------------------------------|---------------------|--------------------------|---------|--------------------------------|---------------------|
| Crude extraction venting | 1.46     | Nm <sup>3</sup> /kg OE         | ESU-Services, 2018  | Crude extraction flaring | 0.02    | Nm <sup>3</sup> /kg OE         | ESU-Services, 2018  |
| Crude extraction venting | 0.000092 | kg/kg                          | NETL, 2008          | Crude extraction flaring | 0.00032 | kg/kg                          | NETL, 2008          |
| Crude extraction venting | 1.028    | m <sup>3</sup> /m <sup>3</sup> | Rahman et al., 2014 | Crude extraction flaring | 5.796   | m <sup>3</sup> /m <sup>3</sup> | Rahman et al., 2014 |

Table 10. Venting and flaring emissions averaged and converted to per unit mass

| Crude extraction venting conversion |          |                        |                            | Crude extraction flaring conversion |            |                     |                            |
|-------------------------------------|----------|------------------------|----------------------------|-------------------------------------|------------|---------------------|----------------------------|
| Process                             | Value    | Unit                   | Source                     | Process                             | Value      | Unit                | Source                     |
| Venting (World average)             | 1.46     | Nm <sup>3</sup> /kg OE | ESU-Services, 2018         | Crude extraction flaring            | 0.02       | kg/kg OE            | ESU-Services, 2018         |
| Venting (U.S.)                      | 0.000129 | Nm <sup>3</sup> /kg    | NETL, 2008                 | Crude extraction flaring            | 0.0004494  | Nm <sup>3</sup> /kg | NETL, 2008                 |
| Venting (U.S.)                      | 0.001268 | Nm <sup>3</sup> /kg    | Rahman et al., 2014        | Crude extraction flaring            | 0.0071483  | Nm <sup>3</sup> /kg | Rahman et al., 2014        |
| Average                             | 0.000699 | Nm <sup>3</sup> /kg    | ESU-Services, 2018 removed | Average                             | 0.00379885 | Nm <sup>3</sup> /kg | ESU-Services, 2018 removed |

Table 11. Flaring of natural gas per kg of crude oil extracted. OE: oil equivalent (ESU-Services, 2018)

| Origin           | Flaring intensity (Nm <sup>3</sup> /kg OE) | Crude oil production (Mt/a) |
|------------------|--------------------------------------------|-----------------------------|
| Russia           | 0.02                                       | 547.00                      |
| Nigeria          | 0.05                                       | 103.00                      |
| Kazakhstan       | 0.02                                       | 79.00                       |
| Norway           | 0.00                                       | 90.00                       |
| Iraq             | 0.01                                       | 193.00                      |
| Mexico           | 0.03                                       | 120.00                      |
| Saudi-Arabia     | 0.00                                       | 598.00                      |
| USA              | 0.01                                       | 556.00                      |
| Algeria          | 0.09                                       | 65.00                       |
| Egypt            | 0.04                                       | 32.00                       |
| Great Britain    | 0.01                                       | 41.00                       |
| Weighted average | 0.02                                       |                             |

The value of crude oil required was generated from Section 7.

Table 12. Composition of natural gas flared per Nm<sup>3</sup>. Bq; becquerel (ESU-Services, 2018)

| Component                              | Unit | Sour natural gas |
|----------------------------------------|------|------------------|
| Methane                                | kg   | 0.000707         |
| Carbon dioxide                         | kg   | 3.71             |
| Carbon monoxide                        | kg   | 0.001            |
| Non-methane volatile organic compounds | kg   | 0.000196         |
| Nitrogen oxides                        | kg   | 0.00163          |

|                     |     |           |
|---------------------|-----|-----------|
| Dinitrogen monoxide | kg  | 0.00002   |
| Particulates <2.5um | kg  | 0.00054   |
| Sulfur dioxide      | kg  | 0.17      |
| Mercury             | kg  | 0.0000002 |
| Radon-222           | kBq | 0.40      |

Table 13. Flaring and venting for five conventional crude sites in North America (Rahman et al., 2014), conversion: Norwegian Petroleum Directorate, 2020

| Crude site | Flaring    | Unit                           | Venting     | Unit                           |
|------------|------------|--------------------------------|-------------|--------------------------------|
| 1          | 3.82       | m <sup>3</sup> /m <sup>3</sup> | 0.68        | m <sup>3</sup> /m <sup>3</sup> |
| 2          | 0.74       | m <sup>3</sup> /m <sup>3</sup> | 0.74        | m <sup>3</sup> /m <sup>3</sup> |
| 3          | 1.33       | m <sup>3</sup> /m <sup>3</sup> | 0.78        | m <sup>3</sup> /m <sup>3</sup> |
| 4          | 13.46      | m <sup>3</sup> /m <sup>3</sup> | 0.95        | m <sup>3</sup> /m <sup>3</sup> |
| 5          | 9.63       | m <sup>3</sup> /m <sup>3</sup> | 1.99        | m <sup>3</sup> /m <sup>3</sup> |
| Average    | 5.796      | m <sup>3</sup> /m <sup>3</sup> | 1.028       | m <sup>3</sup> /m <sup>3</sup> |
| Conversion | 0.00677617 | m <sup>3</sup> /kg             | 0.001201847 | m <sup>3</sup> /kg             |
| Conversion | 0.00714827 | Nm <sup>3</sup> /kg            | 0.001267844 | Nm <sup>3</sup> /kg            |

The significance of natural gas venting in oil and gas production is on average 1.46 Nm<sup>3</sup>/kg oil equivalent (ESU-Services, 2018).

Table 14. Composition of natural gas vented (ESU-Services, 2018)

| Component      | Value    | Unit                 |
|----------------|----------|----------------------|
| Carbon dioxide | 1.40E-02 | kg /Nm <sup>3</sup>  |
| Helium         | 1.00E-03 | kg /Nm <sup>3</sup>  |
| Mercury        | 1.50E-08 | kg /Nm <sup>3</sup>  |
| Methane        | 5.85E-01 | kg /Nm <sup>3</sup>  |
| NM VOC         | 2.71E-01 | kg /Nm <sup>3</sup>  |
| Radon-222      | 1.00E-01 | kBq /Nm <sup>3</sup> |

Table 15. Venting and flaring parameters (NETL, 2008), conversion: (Unitrove, N.D.)

| Parameter | Value    | Unit  | Value      | Unit                |
|-----------|----------|-------|------------|---------------------|
| Flaring   | 0.00032  | lb/lb | 0.00044944 | Nm <sup>3</sup> /kg |
| Venting   | 0.000092 | lb/lb | 0.00012921 | Nm <sup>3</sup> /kg |

Table 16. Water usage and disposal sources for crude oil extraction

| Category                                   | Value | Unit     | Source             | Notes         |
|--------------------------------------------|-------|----------|--------------------|---------------|
| Fresh water usage                          | 0.109 | kg/kg OE | ESU-Services, 2018 | World average |
| Water disposal                             | 1.06  | kg/kg OE | ESU-Services, 2018 | World average |
| Average oil concentration (produced water) | 3.9   | mg/l     | IOGP, 2017         |               |

Table 17. Fresh water usage intensity for major crude oil producers (ESU-Services, 2018)

| Origin           | Fresh water use intensity (m <sup>3</sup> /kg OE) |
|------------------|---------------------------------------------------|
| Russia           | 0.0000166                                         |
| Nigeria          | 0.0000503                                         |
| Kazakhstan       | 0.0000166                                         |
| Norway           | 0.0000420                                         |
| Iraq             | 0.00000314                                        |
| Mexico           | 0.000360                                          |
| Saudi-Arabia     | 0.00000314                                        |
| USA              | 0.000360                                          |
| Weighted average | 0.000109                                          |

Table 18. Water disposal intensity for onshore production of crude oil (ESU-Services, 2018)

| Origin        | Water disposal intensity (onshore) (kg/kg crude oil) |
|---------------|------------------------------------------------------|
| Russia        | 1.37                                                 |
| Nigeria       | 0.42                                                 |
| Kazakhstan    | 1.37                                                 |
| Norway        | -                                                    |
| Iraq          | 1                                                    |
| Mexico        | 1                                                    |
| Saudi-Arabia  | 1                                                    |
| USA           | 0.94                                                 |
| Great Britain | 0.77                                                 |
| Average       | 1.06                                                 |

Table 19. Energy intensity of crude oil extraction (ESU-Services, 2018)

| Origin       | Total fossil energy use | Diesel burned in generator | Electricity from grid |
|--------------|-------------------------|----------------------------|-----------------------|
| Unit         | MJ/kg                   | MJ/kg                      | kWh/kg                |
| Russia       | 2.78                    | 0.014                      | 0.060                 |
| Nigeria      | 4.13                    | 0                          | 0.012                 |
| Kazakhstan   | 2.96                    | 0.03                       | 0.017                 |
| Norway       | 2.04                    | 0.057                      | 0.025                 |
| Iraq         | 4.26                    | 0                          | 0.013                 |
| Mexico       | 5.22                    | 0                          | 0.051                 |
| Saudi-Arabia | 1.01                    | 0                          | 0.013                 |
| USA          | 4.65                    | 0.026                      | 0.032                 |
| Average      | 3.98                    | 0.15                       | 0.02                  |

Table 20. Diesel emissions for sulphur content <15 ppm (U.S. EPA, 1996) (DieselNet, 2019)

| Category                | Value       | Unit                   |
|-------------------------|-------------|------------------------|
| Fuel consumption (U.S.) | 0.026       | MJ diesel/kg crude oil |
| NOx                     | 0.02123816  | g/kg crude oil         |
| PM                      | 0.001117798 | g/kg crude oil         |
| CO <sub>2</sub>         | 1.844366509 | g/kg crude oil         |
| SOx                     | 1.69346E-05 | g/kg crude oil         |

Sulphur content of the diesel found to be 15 ppm which is the limit for non-road fuel that became effective post 2010 (DieselNet, 2009).

Table 21. Grid carbon intensity for U.S. in 2019 (U.S. EIA, 2020)

| Country | Year | Source           | Value | Unit                   |
|---------|------|------------------|-------|------------------------|
| U.S.    | 2019 | (U.S. EIA, 2020) | 0.41  | kgCO <sub>2</sub> /kWh |

## 6 Environmental impacts of crude oil distribution

Table 22. Environmental impacts of crude oil distribution

| Source             | CO <sub>2</sub> | CH <sub>4</sub> | N <sub>2</sub> O | Unit            |
|--------------------|-----------------|-----------------|------------------|-----------------|
| NETL, 2008         | 0.020662        | 2.40441E-05     | 2.68382E-07      | kg/kg crude oil |
| ESU-Services, 2018 |                 | 0.0000015       |                  | kg/kg crude oil |
| Average            | 0.020662        | 1.27721E-05     | 2.68382E-07      | kg/kg crude oil |

## 7 Process energy allocation and resources required for atmospheric distillation

Table 23. Process energy allocation and yield of petroleum products from 1 kg of crude oil feed (Wang, 2004)

| Product        | Mass (kg) | wt.%  | Fuel (kJ) | Electricity (kJ) | Steam (kJ) | Total (kJ) |
|----------------|-----------|-------|-----------|------------------|------------|------------|
| Residual oil   | 0.004     | 0.40  | 3.10      | 0.10             | 1.60       | 4.80       |
| Fuel gas       | 0.044     | 4.36  | 92.90     | 6.20             | 42.10      | 141.20     |
| Naphtha        | 0.001     | 0.10  | 0.50      | 0.10             | 0.90       | 1.50       |
| Diesel         | 0.094     | 9.31  | 147.60    | 9.40             | 39.90      | 196.90     |
| Kerosene       | 0.14      | 13.56 | 192.50    | 11.50            | 45.60      | 249.60     |
| Gasoline       | 0.465     | 46.04 | 1334.70   | 53.60            | 184.40     | 1572.70    |
| LPG            | 0.058     | 5.74  | 28.40     | 5.10             | 44.80      | 78.30      |
| Gas oil        | 0.045     | 4.46  | 126.60    | 2.90             | 18.60      | 148.10     |
| Heavy fuel oil | 0.040     | 3.96  | 58.90     | 3.10             | 12.80      | 74.80      |
| Lube stocks    | 0.07      | 6.93  | 111.40    | 5.30             | 202.10     | 318.80     |
| Asphalt        | 0.02      | 1.98  | 46.80     | 1.50             | 23.50      | 71.80      |
| Waxes          | 0.009     | 0.89  | 14.70     | 0.70             | 26.60      | 42.00      |

|                   |       |        |         |        |        |         |
|-------------------|-------|--------|---------|--------|--------|---------|
| Coke              | 0.005 | 0.50   | 12.10   | 0.30   | 3.60   | 16.00   |
| Hydrogen          | 0.005 | 0.50   | 21.20   | 0.80   | 1.40   | 23.40   |
| Hydrogen sulphide | 0.013 | 1.29   | 6.20    | 0.30   | 1.60   | 8.10    |
| Total             | 1.01  | 100.00 | 2197.60 | 100.90 | 649.50 | 2948.00 |

Table 24. Resources/utilities required for generation of 1 kg propane (Wang, 2004)

| Refinery product | Mass (kg) | Propane (wt.%) | Mass propane (kg) | Fuel (kJ) | Electricity (kJ) | Steam (kJ) | Total (kJ) | Mass crude oil (kg) |
|------------------|-----------|----------------|-------------------|-----------|------------------|------------|------------|---------------------|
| Fuel gas         | 0.717414  | 0.19           | 0.1363086         | 1514.722  | 101.0901         | 686.4347   | 2302.246   | N/A                 |
| LPG              | 0.945682  | 0.9133         | 0.8636914         | 463.0581  | 83.1548          | 730.4578   | 1276.671   | N/A                 |
| Propane          | N/A       | N/A            | 1                 | 1977.78   | 184.2449         | 1416.892   | 3578.917   | 16.30486            |

Table 25. Total electricity environmental impact using U.S. grid carbon intensity

| Utility     | Value    | Unit          | Conversion | Unit                          | Notes                                        |
|-------------|----------|---------------|------------|-------------------------------|----------------------------------------------|
| Electricity | 184.2449 | kJ/kg propane | 0.02098345 | kgCO <sub>2</sub> /kg propane | Assumed grid intensity U.S. (U.S. EIA, 2020) |

Table 26. Environmental impact associated with steam usage in refinery

| Stream  | CO <sub>2</sub> | CH <sub>4</sub> | N <sub>2</sub> O | Unit                   | Source                                                                                                                 |
|---------|-----------------|-----------------|------------------|------------------------|------------------------------------------------------------------------------------------------------------------------|
| Steam   | 0.000069        |                 |                  | kg CO <sub>2</sub> /kJ | Assumed steam boiler efficiency of 0.75 taken (Rahman, 2015) and assumed combustion of refinery gas (Ren et al., 2008) |
| Steam   | 8.77949E-05     | 1.25E-07        | 9.85E-10         | kg/KJ                  | NETL, 2008                                                                                                             |
| Average | 7.83974E-05     | 1.25E-07        | 9.85E-10         | kg/KJ                  |                                                                                                                        |

Table 27. Environmental impact associated with refinery gas combustion

| Stream                         | CO <sub>2</sub> | CH <sub>4</sub> | N <sub>2</sub> O | Unit                   | Source                                                |
|--------------------------------|-----------------|-----------------|------------------|------------------------|-------------------------------------------------------|
| Refinery gas combustion (Fuel) | 0.000069        |                 |                  | kg CO <sub>2</sub> /kJ | Assumed combustion of refinery gas (Ren et al., 2008) |
| Refinery gas combustion (Fuel) | 6.08029E-05     | 1.269E-09       | 6.156E-10        | kg/KJ                  | NETL, 2008                                            |
| Average                        | 6.49E-05        | 1.27E-09        | 6.16E-10         | kg/KJ                  |                                                       |

Table 28. U.S. Refinery water use for cracking, light cracking and heavy cracking (Sun et al., 2018)

| Fuel    | Cracking (L/L) | Light Cracking (L/L) | Heavy Cracking (L/L) | Average (L water/L product) |
|---------|----------------|----------------------|----------------------|-----------------------------|
| Propane | 0.45           | 0.65                 | 0.44                 | 0.513333                    |
| Propene | 0.24           | 0.25                 | 0.24                 | 0.243333                    |



## 8 Natural gas liquid fractionation

Table 29. Values from NETL, 2008. Conversion made according to Norwegian Petroleum Directorate, 2020.

| Process                                       | CO <sub>2</sub> | CH <sub>4</sub> | N <sub>2</sub> O | Unit       |
|-----------------------------------------------|-----------------|-----------------|------------------|------------|
| Natural gas liquids production and processing | 5.33            | 0.105           | 0.000288         | kg/bbl NGL |
| NGL production and processing                 | 0.063691824     | 0.001255        | 3.44E-06         | kg/kg NGL  |

## 9 Propane transportation

Table 30. Values from NETL, 2008. Conversion made according to Norwegian Petroleum Directorate, 2020.

| Process                      | CO <sub>2</sub> | CH <sub>4</sub> | N <sub>2</sub> O | Unit       |
|------------------------------|-----------------|-----------------|------------------|------------|
| Natural gas liquid transport | 4.54            | 2.81E-03        | 8.93E-05         | kg/bbl NGL |
| NGL transport                | 0.054252        | 3.36E-05        | 1.07E-06         | kg/kg NGL  |

## 10 Overall environmental impacts to produce propene from natural gas extraction

Table 31. Environmental impacts of processes involved to produce propene environmental impacts from natural gas extraction

| Natural gas extraction   | Original value | Unit          | Value in common unit | Unit               | Characterised value | Unit                           |
|--------------------------|----------------|---------------|----------------------|--------------------|---------------------|--------------------------------|
| Natural gas required     | 901.2567       | MJ/kg propane |                      |                    |                     |                                |
| Extraction               |                |               |                      |                    |                     |                                |
| CO <sub>2</sub>          | 3.966628       | g/MJ          | 3574.949611          | g/kg propane       | 3.574949611         | kgCO <sub>2</sub> e/kg propane |
| CH <sub>4</sub>          | 0.105473       | g/MJ          | 95.0585183           | g/kg propane       | 1.996228884         | kgCO <sub>2</sub> e/kg propane |
| N <sub>2</sub> O         | 0.000104       | g/MJ          | 0.09412725           | g/kg propane       | 0.029179447         | kgCO <sub>2</sub> e/kg propane |
| Sand                     | 0.421252       | g/MJ          | 379.6559653          | g/kg propane       |                     |                                |
| Water                    | 0.0134         | kg/MJ         | 12.07683978          | kg/kg propane      |                     |                                |
| Rock cutting             | 5.25E-04       | kg/MJ         | 0.47278124           | kg/kg propane      |                     |                                |
| Land use                 | 2.38E-10       | hectare/MJ    | 2.149E-07            | hectare/kg propane |                     |                                |
| Natural gas processing   |                |               |                      |                    |                     |                                |
| Processing               |                |               |                      |                    |                     |                                |
| CO <sub>2</sub>          | 2.097578       | g/MJ          | 1890.456226          | g/kg propane       | 1.890456226         | kgCO <sub>2</sub> e/kg propane |
| CH <sub>4</sub>          | 0.016203       | g/MJ          | 14.60306231          | g/kg propane       | 0.306664309         | kgCO <sub>2</sub> e/kg propane |
| N <sub>2</sub> O         | 8.36E-05       | g/MJ          | 0.07534506           | g/kg propane       | 0.023356969         | kgCO <sub>2</sub> e/kg propane |
| Water                    | 0.00266        | kg/MJ         | 2.397157163          | kg/kg propane      |                     |                                |
| Natural gas distribution |                |               |                      |                    |                     |                                |
| Distribution             |                |               |                      |                    |                     |                                |
| CO <sub>2</sub>          | 2.005          | g/MJ          | 1807.019684          | g/kg propane       | 1.807019684         | kgCO <sub>2</sub> e/kg propane |

|                                  |          |            |             |              |             |                                |
|----------------------------------|----------|------------|-------------|--------------|-------------|--------------------------------|
| $CH_4$                           | 0.016775 | g/MJ       | 15.11858114 | g/kg propane | 0.317490204 | kgCO <sub>2</sub> e/kg propane |
| Natural gas liquid fractionation |          |            |             |              |             |                                |
| Fractionation                    |          |            |             |              |             |                                |
| CO <sub>2</sub>                  | 5.33     | kg/bbl NGL | 0.063691824 | kg/kg NGL    | 0.063691824 | kgCO <sub>2</sub> e/kg propane |
| $CH_4$                           | 0.105    | kg/bbl NGL | 0.001254717 | kg/kg NGL    | 0.026349057 | kgCO <sub>2</sub> e/kg propane |
| N <sub>2</sub> O                 | 0.000288 | kg/bbl NGL | 3.44151E-06 | kg/kg NGL    | 0.001066868 | kgCO <sub>2</sub> e/kg propane |
| Propane transportation           |          |            |             |              |             |                                |
| Transportation                   |          |            |             |              |             |                                |
| CO <sub>2</sub>                  | 4.54     | kg/bbl NGL | 0.054252    | kg/kg NGL    | 0.054252    | kgCO <sub>2</sub> e/kg propane |
| $CH_4$                           | 2.81E-03 | kg/bbl NGL | 3.36E-05    | kg/kg NGL    | 0.0007056   | kgCO <sub>2</sub> e/kg propane |
| N <sub>2</sub> O                 | 8.93E-05 | kg/bbl NGL | 1.07E-06    | kg/kg NGL    | 0.0003317   | kgCO <sub>2</sub> e/kg propane |

The total amount of natural gas required to generate 1kg of propane is determined by converting first into total MJ:

- Propane has a gross heating value of 50.2 MJ/kg (The Engineering Toolbox, N.D.)
- The energy content of propane extracted from natural gas is 5.57% (U.S. EIA, 2020)
- Natural gas energy content 47.5 MJ/kg (IANGV, N.D.)

The breakdown of dry natural gas (U.S. EIA, 2020) and associated natural gas liquids (U.S. EIA, 2020) was obtained:

Table 32. Total dry natural gas production and natural gas liquids in U.S. in 2019 (U.S. EIA, 2020)

| Energy carrier  | Volume  |                        | Energy content |                   | Allocation (%) |
|-----------------|---------|------------------------|----------------|-------------------|----------------|
|                 | Value   | Unit                   | Value          | Unit              |                |
| Dry natural gas | 962,773 | Million m <sup>3</sup> | 36.62554       | MJ/m <sup>3</sup> | 83.58          |
| Ethane          | 667,609 | Thousand barrels       | 3.249572       | GJ/barrel         | 5.14           |
| Propane         | 579,878 | Thousand barrels       | 4.051414       | GJ/barrel         | 5.57           |
| Normal Butane   | 157,628 | Thousand barrels       | 4.568392       | GJ/barrel         | 1.71           |
| Isobutane       | 152,579 | Thousand barrels       | 4.568392       | GJ/barrel         | 1.65           |
| Pentanes plus   | 203,251 | Thousand barrels       | 4.874358       | GJ/barrel         | 2.35           |

Therefore, the energy allocation of propane against total natural gas production and associated liquids is 5.57%.

## 11 Environmental impacts of natural gas extraction

Table 33. Natural gas extraction emissions

| Process            | CO <sub>2</sub> | CH <sub>4</sub> | N <sub>2</sub> O | Unit                             | Source            |
|--------------------|-----------------|-----------------|------------------|----------------------------------|-------------------|
| Extraction (U.S.)  | 42.7            | 2.34            | 0.004            | tonnes/million m <sup>3</sup> NG | NETL, 2008        |
| Extraction (China) | 72.192          | 0.051           | 0.121            | g/MJ                             | Zhou et al., 2019 |

|                             |       |        |  |                         |                                      |
|-----------------------------|-------|--------|--|-------------------------|--------------------------------------|
| Extraction (U.S. Shale)     | 2.13  |        |  | g CO <sub>2</sub> e/ MJ | Chen et al., 2019                    |
| Extraction (U.S. Shale)     |       | 539.46 |  | g CH <sub>4</sub> /MWh  | California air resources board, 2018 |
| Extraction (Canadian shale) | 8.655 |        |  | g CO <sub>2</sub> e/ MJ | Sapkota et al., 2018                 |

Table 34. Natural gas extraction emissions converted to per unit energy

| Process                     | CO <sub>2</sub> | CH <sub>4</sub> | N <sub>2</sub> O | Unit                    | Source                               |
|-----------------------------|-----------------|-----------------|------------------|-------------------------|--------------------------------------|
| Extraction (U.S.)           | 1.11488251      | 0.06109661      | 0.00010444       | g /MJ                   | NETL, 2008                           |
| Extraction (China)          | 72.192          | 0.051           | 0.121            | g/MJ                    | Zhou et al., 2019                    |
| Extraction (U.S. Shale)     | 2.13            |                 |                  | g CO <sub>2</sub> e/ MJ | Chen et al., 2019                    |
| Extraction (U.S. Shale)     |                 | 0.14985         |                  | g CH <sub>4</sub> /MJ   | California air resources board, 2018 |
| Extraction (Canadian shale) | 8.655           |                 |                  | g CO <sub>2</sub> e/ MJ | Sapkota et al., 2018                 |
| Average                     | 3.9666275       | 0.1054733       | 0.00010444       | g/MJ                    | China source removed from average    |

Table 35. Natural gas extraction resource and land use

| Process                     | Sand     | Unit                 | Water    | Unit     | Rock cutting | Unit  | Land use | Unit       | Source           |
|-----------------------------|----------|----------------------|----------|----------|--------------|-------|----------|------------|------------------|
| Extraction (Canadian shale) | 0.016134 | kg/m <sup>3</sup> NG | 0.005524 | kg/MJ NG |              |       |          |            | Raj et al., 2016 |
| Extraction (U.S. Shale)     |          |                      | 0.021367 | kg/MJ    |              |       |          |            | Kuwayama, 2015   |
| Extraction (Canadian shale) |          |                      |          |          | 5.25E-05     | kg/MJ | 2.38E-10 | hectare/MJ | Raj et al., 2016 |

Table 36 .Average water consumption of U.S. shale gas and tight oil (Kuwayama, 2015)

| Fuel      | Average water consumption | Unit          | Average water consumption | Unit  |
|-----------|---------------------------|---------------|---------------------------|-------|
| Shale gas | 5                         | gallons/MMBtu | 0.021528                  | kg/MJ |
| Tight oil | 8.2                       | gallons/MMBtu | 0.035305                  | kg/MJ |

Table 37. Average water and sand use for Canadian shale gas (Raj et al., 2016)

| Well                     | 1        | 2        | 3        | 4        | Weighted Average/Sum | Unit                 |
|--------------------------|----------|----------|----------|----------|----------------------|----------------------|
| Total water              | 9000     | 64000    | 23000    | 43000    | 34837.14             | m <sup>3</sup> /well |
| Total sand               | 1300     | 3700     | 1500     | 4100     | 2511.87              | t/well               |
| Total shale gas          | 1.36E+08 | 1.81E+08 | 2.27E+08 | 1.13E+08 | 6.57E+08             | m <sup>3</sup> /well |
| Share of total shale gas | 2.07E-01 | 2.75E-01 | 3.46E-01 | 1.72E-01 | 1.00E+00             |                      |
| <b>Water use</b>         | 6.62E-05 | 3.54E-04 | 1.01E-04 | 3.81E-04 | 5.52E-03             | kg/MJ                |
| <b>Sand use</b>          | 9.56E-06 | 2.04E-05 | 6.61E-06 | 3.63E-05 | 4.21E-04             | kg/MJ                |

#### Rock cuttings and land use:

One gas well produces between 110 to 550 tons of rock cuttings and requires one to two hectares of land around the well for drilling rigs, waste storage, drill pipe storage and pump trucks (University of Michigan, 2020).

This source was combined with well data from Raj et al. (2016).

## 12 Upstream emissions for natural gas

Table 38. Upstream emissions for natural gas production from conventional and shale gas, all units gCO<sub>2</sub>e/MJ natural gas extracted (Weber, 2012; California Air Resources Board, 2018; EPA, 2019)

| Process/Activity                | Conventi    | Shale      | Conventi    | Shale       | Shale       | Conve      | Shale      | Conver      | Shale       | Conve       | Shale       | Conven        | Shale          | Convent       | Shale           |
|---------------------------------|-------------|------------|-------------|-------------|-------------|------------|------------|-------------|-------------|-------------|-------------|---------------|----------------|---------------|-----------------|
| Well pad construction           | N/A         | 0.1        | 0.2         | 0.1         | N/A         | N/A        | N/A        | 1.6         | 1           | N/A         | 1.5         | 0.0133        | 0.31313        | 0.6044        | 0.602626        |
| Well drilling                   | N/A         | 0.2        | N/A         | N/A         | N/A         | 0.3        | 0.3        | N/A         | N/A         | N/A         | N/A         | N/A           | N/A            | 0.3           | 0.25            |
| Fracking water                  | N/A         | 0.3        | N/A         | N/A         | N/A         | N/A        | 0.3        | N/A         | N/A         | N/A         | N/A         | N/A           | N/A            | 0             | 0.3             |
| Fracking chemicals              | N/A         | 0.1        | N/A         | N/A         | N/A         | N/A        | N/A        | N/A         | N/A         | N/A         | N/A         | N/A           | N/A            | 0             | 0.1             |
| Well completion                 | N/A         | 1          | 0           | 1.3         | 4.7         | 0.4        | 1.6        | 0           | 0.8         | 0           | 8.6         | N/A           | N/A            | 0.1           | 3               |
| <b>Subtotal</b>                 | <b>N/A</b>  | <b>1.7</b> | <b>0.2</b>  | <b>1.4</b>  | <b>4.7</b>  | <b>0.7</b> | <b>2.2</b> | <b>1.6</b>  | <b>1.8</b>  | <b>0</b>    | <b>10.1</b> | <b>0.0133</b> | <b>0.31313</b> | <b>0.5027</b> | <b>3.173304</b> |
| Flaring                         | 0.4         | 0.4        | 1.8         | 2           | N/A         | 2.8        | 2.8        | 0.4         | 0.4         |             |             | N/A           | N/A            | 1.6667        | 1.4             |
| Plant energy                    | 3.7         | 3.7        | N/A         | N/A         | N/A         | N/A        | N/A        | 4.3         | 4.1         | 4.1         | 4.1         | N/A           | N/A            | 4.2           | 3.966667        |
| Vented CO <sub>2</sub> at plant | 1           | 1          | 0.2         | 0.2         | N/A         | N/A        | N/A        | 0.8         | 0.8         |             |             | N/A           | N/A            | 0.5           | 0.666667        |
| Fugitive at well                | 3.4         | 3.4        | 1.8         | 1.8         | 2.1         | 1.4        | 1.4        | 3.6         | 3.6         | 5           | 5           | 3.58          | 3.58           | 3.076         | 2.982857        |
| Fugitive at plant               | 1.5         | 1.5        | 1.2         | 1.2         | 0.6         | N/A        | N/A        | 0.8         | 0.8         | 0.4         | 0.4         | N/A           | N/A            | 0.8           | 0.9             |
| Workover                        | N/A         | N/A        | 0           | 4.6         | 4.7         | N/A        | N/A        | 0           | 1.5         |             |             | 0             | 0.0637         | 0             | 2.715925        |
| Liquid unloading                | 2.5         | N/A        | 6.6         | N/A         | N/A         | N/A        | N/A        | 5.9         | N/A         | 0.6         |             | 0.2389        | 0.2389         | 3.3347        | 0.2389          |
| <b>Subtotal</b>                 | <b>12.5</b> | <b>10</b>  | <b>11.6</b> | <b>9.8</b>  | <b>7.4</b>  | <b>4.2</b> | <b>4.2</b> | <b>15.8</b> | <b>11.2</b> | <b>10.1</b> | <b>9.5</b>  | <b>3.8189</b> | <b>3.8826</b>  | <b>9.1038</b> | <b>7.997514</b> |
| Compression fuel                | 0.4         | 0.4        | 0.4         | 0.4         | N/A         | 0.2        | 0.2        | 0.3         | 0.3         | 0.6         | 0.6         | N/A           | N/A            | 0.375         | 0.38            |
| Fugitive transmission           | 1.9         | 1.9        | 2.3         | 2.3         | 1.8         | 1.7        | 1.7        | 0.9         | 0.9         | 6.8         | 6.8         | 3.899         | 3.899          | 3.1198        | 2.757           |
| <b>Subtotal</b>                 | <b>2.3</b>  | <b>2.3</b> | <b>2.7</b>  | <b>2.7</b>  | <b>1.8</b>  | <b>1.9</b> | <b>1.9</b> | <b>1.2</b>  | <b>1.2</b>  | <b>7.4</b>  | <b>7.4</b>  | <b>3.899</b>  | <b>3.899</b>   | <b>3.2332</b> | <b>3.028429</b> |
| <b>Upstream subtotal</b>        | <b>14.8</b> | <b>14</b>  | <b>14.5</b> | <b>13.9</b> | <b>13.9</b> | <b>6.8</b> | <b>8.3</b> | <b>18.6</b> | <b>14.2</b> | <b>17.5</b> | <b>27</b>   | <b>7.7312</b> | <b>8.09473</b> | <b>13.322</b> | <b>14.19925</b> |

## 13 Environmental impacts of natural gas processing

Table 39. Environmental impacts of natural gas processing

| Process                         | CO <sub>2</sub> | CH <sub>4</sub> | N <sub>2</sub> O | Water usage               | Unit                             | Source                               |
|---------------------------------|-----------------|-----------------|------------------|---------------------------|----------------------------------|--------------------------------------|
| Processing (U.S.)               | 90.4            | 0.29            | 0.0032           |                           | tonnes/million m <sup>3</sup> NG | NETL, 2008                           |
| Processing (China)              |                 |                 |                  | 129                       | kg/t                             | Zhou et al., 2019                    |
| Processing (U.S. Shale gas)     | 2.47            |                 |                  |                           | g CO <sub>2</sub> e/ MJ          | Chen et al., 2019                    |
| Processing (U.S.)               |                 | 89.4            |                  |                           | g CH <sub>4</sub> /MWh           | California air resources board, 2018 |
| Processing (U.S.)               | 1.36            |                 |                  |                           | gCO <sub>2</sub> e/MJ            | EPA, 2019                            |
| Processing (U.S.)               | 2.2             |                 |                  |                           | gCO <sub>2</sub> e/MJ            | Tong, 2015                           |
| Processing (Amine gas treating) | 0.013           | 0.000971        |                  | kg CO <sub>2</sub> /kg NG |                                  | NETL, 2014                           |
| Processing (Dehydration)        |                 | 3.40E-04        |                  | kg CH <sub>4</sub> /kg    |                                  | NETL, 2014                           |

Table 40. Environmental impacts of natural gas processing converted to per unit energy

| Process                     | Value CO <sub>2</sub> | Value CH <sub>4</sub> | Value N <sub>2</sub> O | Water usage | Unit                    | Source                               |
|-----------------------------|-----------------------|-----------------------|------------------------|-------------|-------------------------|--------------------------------------|
| Processing (U.S.)           | 2.36031332            | 0.0075718             | 8.35509E-05            |             | g /MJ                   | NETL, 2008                           |
| Processing (China)          |                       |                       |                        | 0.002659794 | kg/MJ                   | Zhou, 2019                           |
| Processing (U.S. Shale gas) | 2.47                  |                       |                        |             | g CO <sub>2</sub> e/ MJ | Chen et al., 2019                    |
| Processing (U.S.)           |                       | 0.02483333            |                        |             | g CH <sub>4</sub> /MJ   | California air resources board, 2018 |

|                               |            |            |             |             |                       |            |
|-------------------------------|------------|------------|-------------|-------------|-----------------------|------------|
| Processing (U.S.)             | 1.36       |            |             |             | gCO <sub>2</sub> e/MJ | EPA, 2019  |
| Processing (U.S.)             | 2.2        |            |             |             | gCO <sub>2</sub> e/MJ | Tong, 2015 |
| Average                       | 2.09757833 | 0.01620257 | 8.35509E-05 | 0.002659794 |                       |            |
| Sum (Amine gas & Dehydration) | 0.273684   | 0.0276     |             |             | g /MJ                 | NETL, 2014 |

To convert:

- Natural gas energy content 38.3 MJ/m<sup>3</sup> (IANGV, N.D.)
- Natural gas energy content 47.5 MJ/kg (IANGV, N.D.)

## 14 Environmental impacts of natural gas distribution

Table 41. Environmental impacts of natural gas distribution

| Process                   | CO <sub>2</sub> | CH <sub>4</sub> | N <sub>2</sub> O | Unit                   | Source                               |
|---------------------------|-----------------|-----------------|------------------|------------------------|--------------------------------------|
| Pipeline (Canadian shale) | 1.82            |                 |                  | gCO <sub>2</sub> eq/MJ | Sapkota et al., 2018                 |
| Distribution (U.S.)       |                 | 60.39           |                  | g/MWh                  | California air resources board, 2018 |
| Distribution (U.S.)       | 2.19            |                 |                  | gCO <sub>2</sub> eq/MJ | EPA, 2019                            |

Table 42. Environmental impacts of natural gas distribution converted to per unit energy

| Process                   | Value CO <sub>2</sub> | Value CH <sub>4</sub> | Value N <sub>2</sub> O | Unit                   | Source                               |
|---------------------------|-----------------------|-----------------------|------------------------|------------------------|--------------------------------------|
| Pipeline (Canadian shale) | 1.82                  |                       |                        | gCO <sub>2</sub> eq/MJ | Sapkota et al., 2018                 |
| Distribution (U.S.)       |                       | 0.016775              |                        | g/MJ                   | California air resources board, 2018 |
| Distribution (U.S.)       | 2.19                  |                       |                        | gCO <sub>2</sub> eq/MJ | EPA, 2019                            |
| Average                   | 2.005                 | 0.016775              | 0                      | g/MJ                   |                                      |

## 15 Environmental impacts of natural gas liquid fractionation

Table 43. Environmental impacts of natural gas liquid fractionation

| Process                                       | Value CO <sub>2</sub> | Value CH <sub>4</sub> | Value N <sub>2</sub> O | Unit       | Source     |
|-----------------------------------------------|-----------------------|-----------------------|------------------------|------------|------------|
| Natural gas liquids production and processing | 5.33                  | 0.105                 | 0.000288               | kg/bbl NGL | NETL, 2008 |
| NGL production and processing                 | 0.063692              | 0.001254717           | 3.44151E-06            | kg/kg NGL  |            |

## 16 Environmental impacts of propane transportation

Table 44. Environmental impacts of propane transportation

| Process                      | CO <sub>2</sub> | CH <sub>4</sub> | N <sub>2</sub> O | Unit       | Source     |
|------------------------------|-----------------|-----------------|------------------|------------|------------|
| Natural gas liquid transport | 4.54            | 2.81E-03        | 8.93E-05         | kg/bbl NGL | NETL, 2008 |
| NGL transport                | 0.054252        | 3.36E-05        | 1.07E-06         | kg/kg NGL  |            |

## 17 Overall environmental impacts to produce propene from steam cracking

Table 45. Environmental impacts of processes involved to produce propene from steam cracking

| <b>Crude extraction</b>                         | Original value | Unit                    | Value in common unit | Unit                        | Characterised value | Unit                            |
|-------------------------------------------------|----------------|-------------------------|----------------------|-----------------------------|---------------------|---------------------------------|
| Crude oil required                              | 87.4125874     | kg crude oil/kg propene |                      |                             |                     |                                 |
| <b>Flaring</b>                                  | 0.00379885     | Nm <sup>3</sup> /kg OE  | 0.332067308          | Nm <sup>3</sup> /kg propene | 1.4067523           | kg CO <sub>2</sub> e/kg propene |
| Methane                                         | 0.000707       | kg/Nm <sup>3</sup>      | 0.000234772          | kg/kg propene               | 0.0049302           | kg CO <sub>2</sub> e/kg propene |
| Carbon dioxide                                  | 3.71           | kg/Nm <sup>3</sup>      | 1.231969711          | kg/kg propene               | 1.2319697           | kg CO <sub>2</sub> e/kg propene |
| Carbon monoxide                                 | 0.001          | kg/Nm <sup>3</sup>      | 0.000332067          | kg/kg propene               |                     |                                 |
| Non-methane volatile organic compounds          | 0.000196       | kg/Nm <sup>3</sup>      | 6.50852E-05          | kg/kg propene               |                     |                                 |
| Nitrogen oxides                                 | 0.00163        | kg/Nm <sup>3</sup>      | 0.00054127           | kg/kg propene               | 0.1677936           | kg CO <sub>2</sub> e/kg propene |
| Dinitrogen monoxide                             | 0.00002        | kg/Nm <sup>3</sup>      | 6.64135E-06          | kg/kg propene               | 0.0020588           | kg CO <sub>2</sub> e/kg propene |
| Particulates <2.5um                             | 0.00054        | kg/Nm <sup>3</sup>      | 0.000179316          | kg/kg propene               |                     |                                 |
| Sulfur dioxide                                  | 0.17           | kg/Nm <sup>3</sup>      | 0.056451442          | kg/kg propene               |                     |                                 |
| Mercury                                         | 0.0000002      | kg/Nm <sup>3</sup>      | 6.64135E-08          | kg/kg propene               |                     |                                 |
| Radon-222                                       | 0.4            | kg/Nm <sup>3</sup>      | 0.132826923          | kg/kg propene               |                     |                                 |
| <b>Venting</b>                                  | 0.0007         | Nm <sup>3</sup> /kg OE  | 0.061188811          | Nm <sup>3</sup> /kg propane | 0.7525612           | kg CO <sub>2</sub> e/kg propene |
| Methane                                         | 5.85E-01       | kg/Nm <sup>3</sup>      | 0.035795455          | kg/kg propene               | 0.7517045           | kg CO <sub>2</sub> e/kg propene |
| Carbon dioxide                                  | 1.40E-02       | kg/Nm <sup>3</sup>      | 0.000856643          | kg/kg propene               | 0.0008566           | kg CO <sub>2</sub> e/kg propene |
| Helium                                          | 1.00E-03       | kg/Nm <sup>3</sup>      | 6.11888E-05          | kg/kg propene               |                     |                                 |
| Non-methane volatile organic compounds          | 2.71E-01       | kg/Nm <sup>3</sup>      | 0.016582168          | kg/kg propene               |                     |                                 |
| Mercury                                         | 1.50E-08       | kg/Nm <sup>3</sup>      | 9.17832E-10          | kg/kg propene               |                     |                                 |
| Radon-222                                       | 1.00E-01       | kBq/Nm <sup>3</sup>     | 0.006118881          | kg/kg propene               |                     |                                 |
| <b>Water Usage &amp; disposal</b>               |                |                         |                      |                             |                     |                                 |
| Fresh water usage                               | 0.109          | kg/kg OE                |                      |                             | 9.527972            | kg/kg propene                   |
| Water disposal intensity (onshore)              | 1.06           | kg/kg OE                |                      |                             | 92.657343           | kg/kg propene                   |
| Average oil concentration (produced water)      | 3.9            | mg/l                    |                      |                             | 361.36364           | mg/kg propene                   |
| <b>Emissions of energy usage for extraction</b> |                |                         |                      |                             | 1.8835836           | kg CO <sub>2</sub> e/kg propene |
| Diesel burned in generator                      | 0.026          | MJ/kg                   |                      |                             |                     |                                 |
| NOx                                             | 0.02123816     | g/kg crude oil          | 1.8564825            | g/kg propene                | 0.5755096           | kg CO <sub>2</sub> e/kg propene |
| PM                                              | 0.001117798    | g/kg crude oil          | 0.097709605          | g/kg propene                |                     |                                 |
| CO <sub>2</sub>                                 | 1.844366509    | g/kg crude oil          | 161.2208487          | g/kg propene                | 0.1612208           | kg CO <sub>2</sub> e/kg propene |
| SOx                                             | 1.69346E-05    | g/kg crude oil          | 0.001480301          | g/kg propene                |                     |                                 |
| Electricity from grid                           | 0.032          | kWh/kg                  | 0.41                 | kgCO <sub>2</sub> /kWh      | 1.1468531           | kg CO <sub>2</sub> e/kg propene |
| <b>Crude distribution</b>                       |                |                         |                      |                             |                     |                                 |

|                                 |             |                                        |             |               |           |                                 |
|---------------------------------|-------------|----------------------------------------|-------------|---------------|-----------|---------------------------------|
| Pipeline                        |             |                                        |             |               | 1.8368161 | kg CO <sub>2</sub> e/kg propene |
| CO <sub>2</sub>                 | 2.81        | kg/bbl extracted                       | 1806.098313 | g/kg propene  | 1.8060983 | kg CO <sub>2</sub> e/kg propene |
| CH <sub>4</sub>                 | 1.74E-03    | kg/bbl extracted                       | 1.116438708 | g/kg propene  | 0.0234452 | kg CO <sub>2</sub> e/kg propene |
| N <sub>2</sub> O                | 3.65E-05    | kg/bbl extracted                       | 0.023459996 | g/kg propene  | 0.0072726 | kg CO <sub>2</sub> e/kg propene |
| <b>Atmospheric distillation</b> |             |                                        |             |               |           |                                 |
| Atmospheric distillation        | 6.99        | kg naphtha/kg propene                  |             |               | 1.8207261 | kg CO <sub>2</sub> e/kg propene |
| CO <sub>2</sub>                 | 0.25960588  | kg/kg naphtha                          | 1.814645098 | kg/kg propene | 1.8146451 | kg CO <sub>2</sub> e/kg propene |
| CH <sub>4</sub>                 | 5.07638E-06 | kg/kg naphtha                          | 3.54839E-05 | kg/kg propene | 0.0007452 | kg CO <sub>2</sub> e/kg propene |
| N <sub>2</sub> O                | 2.46242E-06 | kg/kg naphtha                          | 1.72123E-05 | kg/kg propene | 0.0053358 | kg CO <sub>2</sub> e/kg propene |
| Water usage                     | 0.243333333 | m <sup>3</sup> /m <sup>3</sup> propene |             |               | 0.4623333 | kg/kg propene                   |
| <b>Steam cracking</b>           |             |                                        |             |               |           |                                 |
| Steam cracking                  |             |                                        |             |               | 1.42E+00  | kg CO <sub>2</sub> e/kg propene |
| CO <sub>2</sub>                 | 1.15E+00    | kg/kg propene                          |             |               | 1.15E+00  | kg CO <sub>2</sub> e/kg propene |
| CH <sub>4</sub>                 | 2.62E-05    | kg/kg propene                          |             |               | 5.51E-04  | kg CO <sub>2</sub> e/kg propene |
| N <sub>2</sub> O                | 3.40E-04    | kg/kg propene                          |             |               | 1.06E-01  | kg CO <sub>2</sub> e/kg propene |
| NO <sub>x</sub>                 | 5.18E-04    | kg/kg propene                          |             |               | 1.61E-01  | kg CO <sub>2</sub> e/kg propene |
| CO                              | 5.58E-04    | kg/kg propene                          |             |               |           |                                 |
| SO <sub>2</sub>                 | 1.27E-05    | kg/kg propene                          |             |               |           |                                 |
| VOC                             | 7.97E-05    | kg/kg propene                          |             |               |           |                                 |
| PM2.5                           | 1.27E-04    | kg/kg propene                          |             |               |           |                                 |
| PM10                            | 1.27E-04    | kg/kg propene                          |             |               |           |                                 |
| <b>Fractionation</b>            |             |                                        |             |               |           |                                 |
| Fractionation                   |             |                                        |             |               | 0.0911077 | kgCO <sub>2</sub> e/kg propene  |
| CO <sub>2</sub>                 | 5.33        | kg/bbl NGL                             | 0.063691824 | kg/kg NGL     | 0.0636918 | kgCO <sub>2</sub> e/kg propene  |
| CH <sub>4</sub>                 | 0.105       | kg/bbl NGL                             | 0.001254717 | kg/kg NGL     | 2.63E-02  | kgCO <sub>2</sub> e/kg propene  |
| N <sub>2</sub> O                | 0.000288    | kg/bbl NGL                             | 3.44151E-06 | kg/kg NGL     | 1.07E-03  | kgCO <sub>2</sub> e/kg propene  |

## 18 Environmental impacts of steam cracking

Table 46. Environmental impacts of steam cracking

| Process               | CO <sub>2</sub> | CH <sub>4</sub> | N <sub>2</sub> O | NO <sub>x</sub> | CO | SO <sub>2</sub> | VOC | PM2.5 | PM10 | Unit          | Source                                                |
|-----------------------|-----------------|-----------------|------------------|-----------------|----|-----------------|-----|-------|------|---------------|-------------------------------------------------------|
| Naphtha steam cracker | 6.83E-01        | 1.52E-05        | 7.39E-06         |                 |    |                 |     |       |      | kg/kg propene | Ren et al., 2008                                      |
| Naphtha steam cracker | 0.881973        | 1.97E-05        | 9.54E-06         |                 |    |                 |     |       |      | kg/kg propene | Ren et al., 2006<br>(Converting energy use into fuel) |

|                       |          |          |          |          |          |          |          |          |          |               | grade by product emissions)                              |
|-----------------------|----------|----------|----------|----------|----------|----------|----------|----------|----------|---------------|----------------------------------------------------------|
| Naphtha steam cracker | 1.7      |          |          |          |          |          |          |          |          | kg/kg propene | Ren et al., 2006                                         |
| Naphtha steam cracker | 1.3      |          | 1.33E-03 |          |          |          |          |          |          |               | Keller et al., 2020                                      |
| Naphtha steam cracker | 1.195166 | 4.38E-05 | 1.59E-05 | 0.000518 | 0.000558 | 1.27E-05 | 8E-05    | 0.000127 | 0.000127 | kg/kg propene | Lee and Elgowainy, 2018 (Natural gas is combustion fuel) |
| Average               | 1.15E+00 | 2.62E-05 | 3.40E-04 | 5.18E-04 | 5.58E-04 | 1.27E-05 | 7.97E-05 | 1.27E-04 | 1.27E-04 | kg/kg propene |                                                          |

Table 47. Average steam cracker yield of propene when naphtha used as feedstock

| Feedstock | Value | Unit  | Source                  |
|-----------|-------|-------|-------------------------|
| Naphtha   | 13    | % wt. | Akah, 2015              |
| Naphtha   | 14.5  | % wt. | Ren et al., 2006        |
| Naphtha   | 15.4  | % wt. | Lee and Elgowainy, 2018 |
| Average   | 14.3  | % wt. |                         |

Yield of naphtha is 8 wt.% crude oil (Ren, 2008)

Table 48. Environmental impact of producing naphtha from atmospheric distillation of crude oil (Ren, 2008)

| Process                            | CO <sub>2</sub> | CH <sub>4</sub> | N <sub>2</sub> O | Unit          | Source           |
|------------------------------------|-----------------|-----------------|------------------|---------------|------------------|
| Naphtha production (world average) | 2.60E-01        | 5.08E-06        | 2.46E-06         | kg/kg naphtha | Ren et al., 2008 |

## 19 Overall environmental impacts to produce propene from fluid catalytic cracking

Table 49. Environmental impacts of processes involved to produce from fluid catalytic cracking

| Crude extraction                       | Original value | Unit                    | Value in common unit | Unit                        | Characterised value | Unit                            |
|----------------------------------------|----------------|-------------------------|----------------------|-----------------------------|---------------------|---------------------------------|
| Crude oil required                     | 33.38214248    | kg crude oil/kg propene |                      |                             |                     |                                 |
| <b>Flaring</b>                         | 0.00379885     | Nm <sup>3</sup> /kg OE  | 0.126813752          | Nm <sup>3</sup> /kg propene | 0.5372271           | kg CO <sub>2</sub> e/kg propene |
| Methane                                | 0.000707       | kg/Nm <sup>3</sup>      | 8.96573E-05          | kg/kg propene               | 0.0018828           | kg CO <sub>2</sub> e/kg propene |
| Carbon dioxide                         | 3.71           | kg/Nm <sup>3</sup>      | 0.47047902           | kg/kg propene               | 0.470479            | kg CO <sub>2</sub> e/kg propene |
| Carbon monoxide                        | 0.001          | kg/Nm <sup>3</sup>      | 0.000126814          | kg/kg propene               |                     |                                 |
| Non-methane volatile organic compounds | 0.000196       | kg/Nm <sup>3</sup>      | 2.48555E-05          | kg/kg propene               |                     |                                 |
| Nitrogen oxides                        | 0.00163        | kg/Nm <sup>3</sup>      | 0.000206706          | kg/kg propene               | 0.064079            | kg CO <sub>2</sub> e/kg propene |
| Dinitrogen monoxide                    | 0.00002        | kg/Nm <sup>3</sup>      | 2.53628E-06          | kg/kg propene               | 0.0007862           | kg CO <sub>2</sub> e/kg propene |



|                                                 |             |                                                |             |                             |           |                                 |
|-------------------------------------------------|-------------|------------------------------------------------|-------------|-----------------------------|-----------|---------------------------------|
| Particulates <2.5um                             | 0.00054     | kg/Nm <sup>3</sup>                             | 6.84794E-05 | kg/kg propene               |           |                                 |
| Sulfur dioxide                                  | 0.17        | kg/Nm <sup>3</sup>                             | 0.021558338 | kg/kg propene               |           |                                 |
| Mercury                                         | 0.0000002   | kg/Nm <sup>3</sup>                             | 2.53628E-08 | kg/kg propene               |           |                                 |
| Radon-222                                       | 0.4         | kg/Nm <sup>3</sup>                             | 0.050725501 | kg/kg propene               |           |                                 |
| <b>Venting</b>                                  | 0.0007      | Nm <sup>3</sup> /kg OE                         | 0.0233675   | Nm <sup>3</sup> /kg propane | 0.2873969 | kg CO <sub>2</sub> e/kg propene |
| Methane                                         | 5.85E-01    | kg/Nm <sup>3</sup>                             | 0.013669987 | kg/kg propene               | 0.2870697 | kg CO <sub>2</sub> e/kg propene |
| Carbon dioxide                                  | 1.40E-02    | kg/Nm <sup>3</sup>                             | 0.000327145 | kg/kg propene               | 0.0003271 | kg CO <sub>2</sub> e/kg propene |
| Helium                                          | 1.00E-03    | kg/Nm <sup>3</sup>                             | 2.33675E-05 | kg/kg propene               |           |                                 |
| Non-methane volatile organic compounds          | 2.71E-01    | kg/Nm <sup>3</sup>                             | 0.006332592 | kg/kg propene               |           |                                 |
| Mercury                                         | 1.50E-08    | kg/Nm <sup>3</sup>                             | 3.50512E-10 | kg/kg propene               |           |                                 |
| Radon-222                                       | 1.00E-01    | kBq/Nm <sup>3</sup>                            | 0.00233675  | kg/kg propene               |           |                                 |
| <b>Water Usage &amp; disposal</b>               |             |                                                |             |                             |           |                                 |
| Fresh water usage                               | 0.109       | kg/kg OE                                       |             |                             | 3.6386535 | kg/kg propene                   |
| Water disposal intensity (onshore)              | 1.06        | kg/kg OE                                       |             |                             | 35.385071 | kg/kg propene                   |
| Average oil concentration (produced water)      | 3.9         | mg/l                                           |             |                             | 138.00178 | mg/kg propene                   |
| <b>Emissions of energy usage for extraction</b> |             |                                                |             |                             | 0.719325  | kg CO <sub>2</sub> e/kg propene |
| Diesel burned in generator                      | 0.026       | MJ/kg                                          |             |                             |           |                                 |
| NOx                                             | 0.02123816  | g/kg crude oil                                 | 0.708975277 | g/kg propene                | 0.2197823 | kg CO <sub>2</sub> e/kg propene |
| PM                                              | 0.001117798 | g/kg crude oil                                 | 0.037314488 | g/kg propene                |           |                                 |
| CO <sub>2</sub>                                 | 1.844366509 | g/kg crude oil                                 | 61.56890559 | g/kg propene                | 0.0615689 | kg CO <sub>2</sub> e/kg propene |
| SOx                                             | 1.69346E-05 | g/kg crude oil                                 | 0.000565314 | g/kg propene                |           |                                 |
| Electricity from grid                           | 0.032       | kWh/kg                                         | 0.41        | kgCO <sub>2</sub> /kWh      | 0.4379737 | kg CO <sub>2</sub> e/kg propene |
| <b>Crude distribution</b>                       |             |                                                |             |                             |           |                                 |
| Pipeline                                        |             |                                                |             |                             | 0.7014649 | kg CO <sub>2</sub> e/kg propene |
| CO <sub>2</sub>                                 | 2.81        | kg/bbl extracted                               | 689.7339732 | g/kg propene                | 0.689734  | kg CO <sub>2</sub> e/kg propene |
| CH <sub>4</sub>                                 | 1.74E-03    | kg/bbl extracted                               | 0.426358687 | g/kg propene                | 0.0089535 | kg CO <sub>2</sub> e/kg propene |
| N <sub>2</sub> O                                | 3.65E-05    | kg/bbl extracted                               | 0.008959178 | g/kg propene                | 0.0027773 | kg CO <sub>2</sub> e/kg propene |
| <b>Atmospheric &amp; Vacuum distillation</b>    |             |                                                |             |                             |           |                                 |
| Atmospheric & Vacuum distillation               | 18.69399979 | kg unfinished oil (gas oil/residue)/kg propene |             |                             | 1.87E+00  | kg CO <sub>2</sub> e/kg propene |
| CO <sub>2</sub>                                 | 9.73E-02    | kg/kg unfinished oil                           | 1.82E+00    | kg/kg propene               | 1.82E+00  | kg CO <sub>2</sub> e/kg propene |
| CH <sub>4</sub>                                 | 1.17E-04    | kg/kg unfinished oil                           | 2.19E-03    | kg/kg propene               | 4.60E-02  | kg CO <sub>2</sub> e/kg propene |
| N <sub>2</sub> O                                | 1.71E-06    | kg/kg unfinished oil                           | 3.19E-05    | kg/kg propene               | 9.90E-03  | kg CO <sub>2</sub> e/kg propene |
| Water usage                                     | 0.243333333 | m <sup>3</sup> /m <sup>3</sup> propene         |             |                             | 0.4623333 | kg/kg propene                   |

| <b>Fluid catalytic cracking</b> |             |               |             |           |           |                                 |
|---------------------------------|-------------|---------------|-------------|-----------|-----------|---------------------------------|
| <i>FCC</i>                      |             |               |             |           | 1.7362352 | kg CO <sub>2</sub> e/kg propene |
| CO <sub>2</sub>                 | 0.852311642 | kg/kg propene |             |           | 0.8523116 | kg CO <sub>2</sub> e/kg propene |
| CH <sub>4</sub>                 | 9.44388E-05 | kg/kg propene |             |           | 1.98E-03  | kg CO <sub>2</sub> e/kg propene |
| N <sub>2</sub> O                | 1.77073E-05 | kg/kg propene |             |           | 5.49E-03  | kg CO <sub>2</sub> e/kg propene |
| NO <sub>x</sub>                 | 0.002827262 | kg/kg propene |             |           | 8.76E-01  | kg CO <sub>2</sub> e/kg propene |
| SO <sub>2</sub>                 | 0.000493836 | kg/kg propene |             |           |           |                                 |
| SO <sub>x</sub>                 | 0.027711887 | kg/kg propene |             |           |           |                                 |
| HCN                             | 1.69203E-07 | kg/kg propene |             |           |           |                                 |
| <i>PM</i>                       | 0.004581594 | kg/kg propene |             |           |           |                                 |
| NH <sub>3</sub>                 | 0.00314796  | kg/kg propene |             |           |           |                                 |
| <i>Pb</i>                       | 6.29592E-06 | kg/kg propene |             |           |           |                                 |
| <i>Hg</i>                       | 1.37723E-06 | kg/kg propene |             |           |           |                                 |
| As                              | 2.75447E-07 | kg/kg propene |             |           |           |                                 |
| VOC                             | 8.46014E-05 | kg/kg propene |             |           |           |                                 |
| <b>Fractionation</b>            |             |               |             |           |           |                                 |
| <i>Fractionation</i>            |             |               |             |           | 0.0911077 | kg CO <sub>2</sub> e/kg propene |
| CO <sub>2</sub>                 | 5.33        | kg/bbl NGL    | 0.063691824 | kg/kg NGL | 0.0636918 | kg CO <sub>2</sub> e/kg propene |
| CH <sub>4</sub>                 | 0.105       | kg/bbl NGL    | 0.001254717 | kg/kg NGL | 2.63E-02  | kg CO <sub>2</sub> e/kg propene |
| N <sub>2</sub> O                | 0.000288    | kg/bbl NGL    | 3.44151E-06 | kg/kg NGL | 1.07E-03  | kg CO <sub>2</sub> e/kg propene |

## 20 Environmental impacts of atmospheric & vacuum distillation

Table 50. Environmental impacts of atmospheric & vacuum distillation

| Process             | CO <sub>2</sub> | CH <sub>4</sub> | N <sub>2</sub> O | Unit                   | Source     |
|---------------------|-----------------|-----------------|------------------|------------------------|------------|
| Vacuum distillation | 14.7            | 0.0177          | 0.000258         | kg/bbl unfinished oils | NETL, 2008 |
| Vacuum distillation | 0.0973032       | 0.0001172       | 1.71E-06         | kg/kg unfinished oil   | NETL, 2008 |

## 21 Environmental impacts of fluid catalytic cracking catalytic cracking

Table 51. Environmental impacts of fluid catalytic cracking catalytic cracking

| FCC emissions                          | CO <sub>2</sub> | CH <sub>4</sub> | N <sub>2</sub> O | NO <sub>x</sub> | SO <sub>2</sub> | SO <sub>x</sub> | HCN   | PM       | NH <sub>3</sub> | Pb      | Hg      | As    | VOC   | Unit          | Source              |
|----------------------------------------|-----------------|-----------------|------------------|-----------------|-----------------|-----------------|-------|----------|-----------------|---------|---------|-------|-------|---------------|---------------------|
| FCC unit with ESP & CO boiler          |                 |                 |                  | 0.00401         |                 | 0.0278          | 2E-07 | 0.002518 |                 |         |         |       |       | kg/kg propene | U.S. EPA, 2015      |
| FCC regenerator and reformer emissions |                 |                 |                  | 0.00393         |                 | 0.0276          |       | 0.010821 | 0.0031          | 6.3E-06 | 1.4E-06 | 3E-07 |       | kg/kg propene | EEA, 2016           |
| FCC (China)                            | 0.09            |                 |                  |                 |                 |                 |       |          |                 |         |         |       |       | kg/kg propene | Jia et al., 2020    |
| FCC                                    | 0.18261         |                 |                  |                 |                 |                 |       |          |                 |         |         |       |       | kg/kg propene | Elgowainy, 2014     |
| FCC (synthetic crude oil)              | 0.12374         |                 |                  |                 |                 |                 |       |          |                 |         |         |       |       | kg/kg propene | Nimana et al., 2015 |
| FCC                                    | 3.01289         | 9E-05           | 1.8E-05          | 0.00053         | 0.00049         |                 |       | 0.000405 |                 |         |         |       | 8E-05 | kg/kg propene | Sun et al., 2019    |
| Average                                | 0.85231         | 9E-05           | 1.8E-05          | 0.00283         | 0.00049         | 0.0277          | 2E-07 | 0.004582 | 0.0031          | 6.3E-06 | 1.4E-06 | 3E-07 | 8E-05 | kg/kg propene |                     |

Table 52. Yield of propene from FCC when a gas oil feed is used

| FCC yield           | Value    | Unit                 | Source                |
|---------------------|----------|----------------------|-----------------------|
| Vacuum gas oil feed | 5.647922 | wt.% propene overall | Stratiev et al., 2020 |
| Gas oil feed        | 5.4      | wt.% propene overall | Adewuyi et al., 1995  |
| Vacuum gas oil feed | 5        | wt.% propene overall | Siddiqui et al., 2011 |
| Average             | 5.349307 | wt.% propene overall |                       |

Table 53. Yield of gas oil and residue from atmospheric distillation (Babusiaux, 2007)

| Yield of FCC feedstock | Value | Unit  | Source          |
|------------------------|-------|-------|-----------------|
| Gas oil                | 37    | % wt. | Babusiaux, 2007 |
| Residue                | 19    | % wt. | Babusiaux, 2007 |

Table 54. Density of vacuum gas oil and residue

| Feedstock      | Density         | Source                | Density        | Source                    | Unit              |
|----------------|-----------------|-----------------------|----------------|---------------------------|-------------------|
| Vacuum gas oil | 840 (288.15 K)  | Mercuria, 2015        | 910            | Mozyr Oil Refinery, N.D.) | kg/m <sup>3</sup> |
| Residue        | 1200 (313.15 K) | Djimasbe et al., 2019 | 993 (343.15 K) | Ahmed, 2019               | kg/m <sup>3</sup> |

Energy density of propene: 20.99 MJ/kg (The Engineering Toolbox, 2005)

## 22 Impact categories and global warming potentials

Table 55. Impact categories and global warming potentials (Sleeswijk et al., 2008; Hull, 2009)

| Substance       | Global warming potential | Acidification        | Photochemical oxidant formation | Particulate matter formation | Human toxicity | Fossil resource energy depletion |
|-----------------|--------------------------|----------------------|---------------------------------|------------------------------|----------------|----------------------------------|
| Unit            | kg CO <sub>2</sub> e     | kg SO <sub>2</sub> e | kg NMVOCe                       | kg PM10eq                    | kg 1,4-DCBe    | kg Sbe                           |
| SO <sub>2</sub> |                          | 35                   |                                 | 26                           |                |                                  |
| NO <sub>x</sub> | 310                      | 22                   | 33                              | 26                           |                |                                  |
| NM VOC          |                          |                      | 48                              |                              |                |                                  |
| PM10            |                          |                      |                                 | 29                           |                |                                  |
| Mercury         |                          |                      |                                 |                              | 3              |                                  |
| Crude oil       |                          |                      |                                 |                              |                | 44                               |
| Natural gas     |                          |                      |                                 |                              |                | 31                               |
| NH <sub>3</sub> |                          | 44                   |                                 |                              |                |                                  |
| Pb              |                          |                      |                                 |                              | 9              |                                  |
| Hg              |                          |                      |                                 |                              | 3              |                                  |
| As              |                          |                      |                                 |                              | 12             |                                  |
| CH <sub>4</sub> | 21                       |                      |                                 |                              |                |                                  |

23 Process flow diagrams

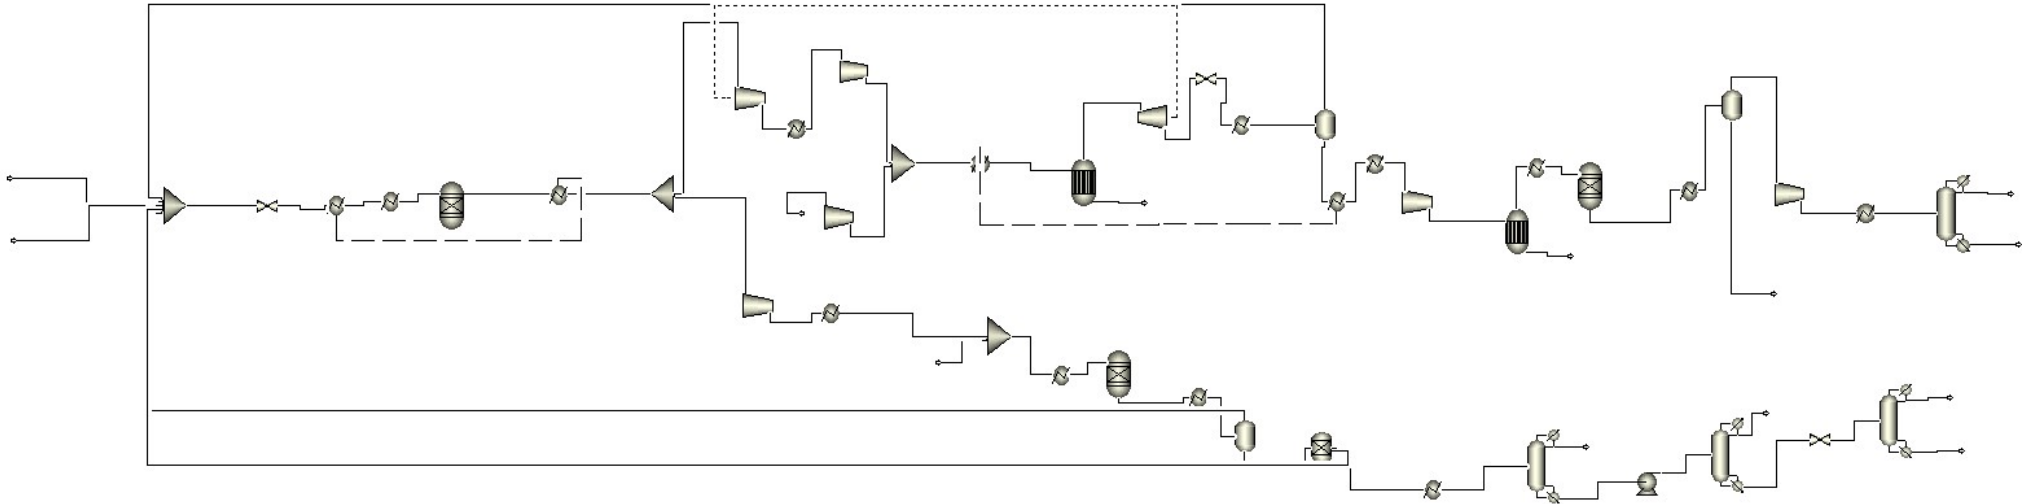

Figure 5. Overall chemical plant

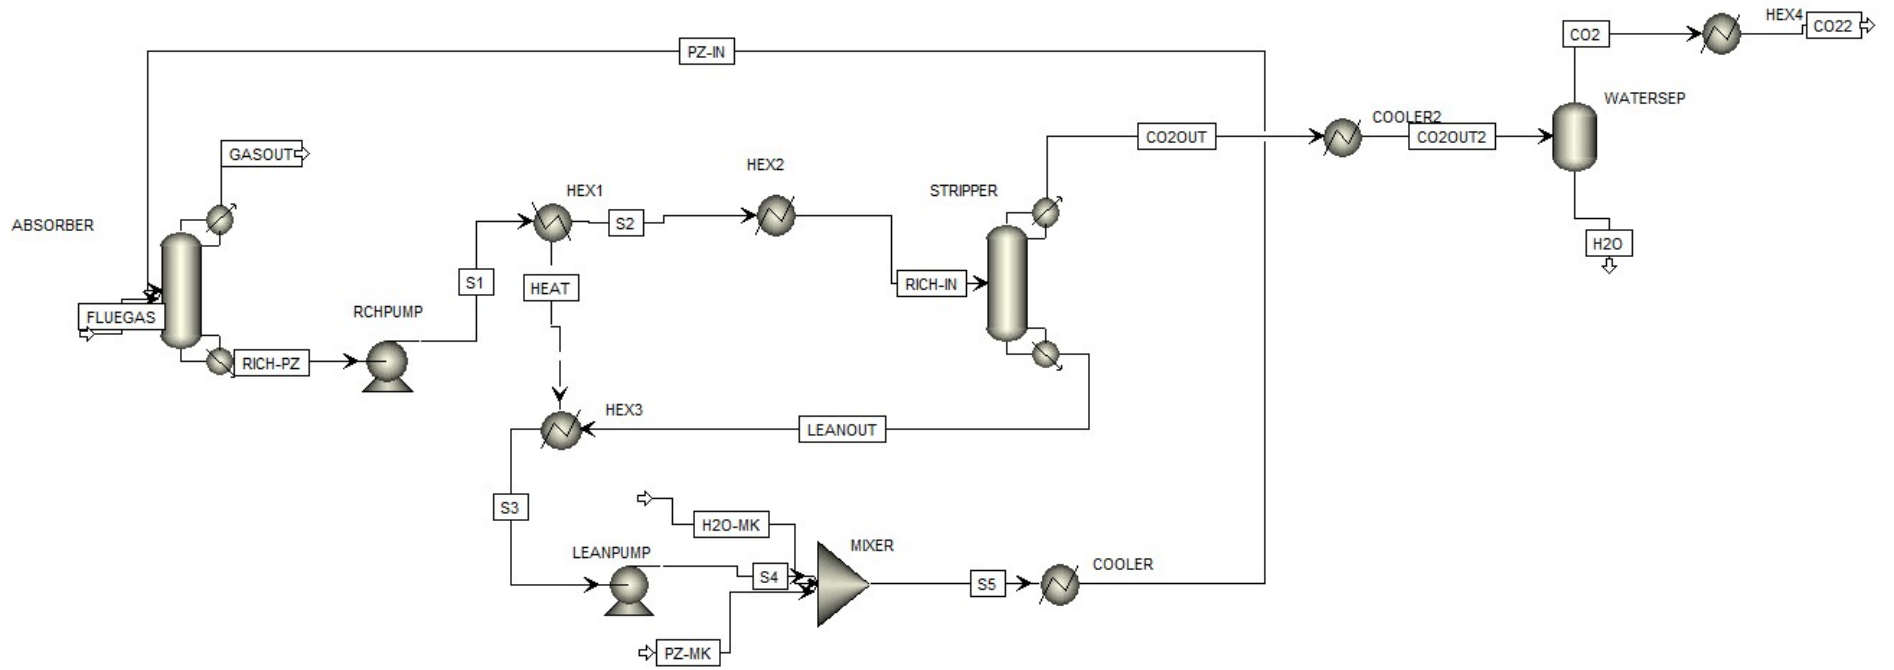

Figure 6. Carbon capture process

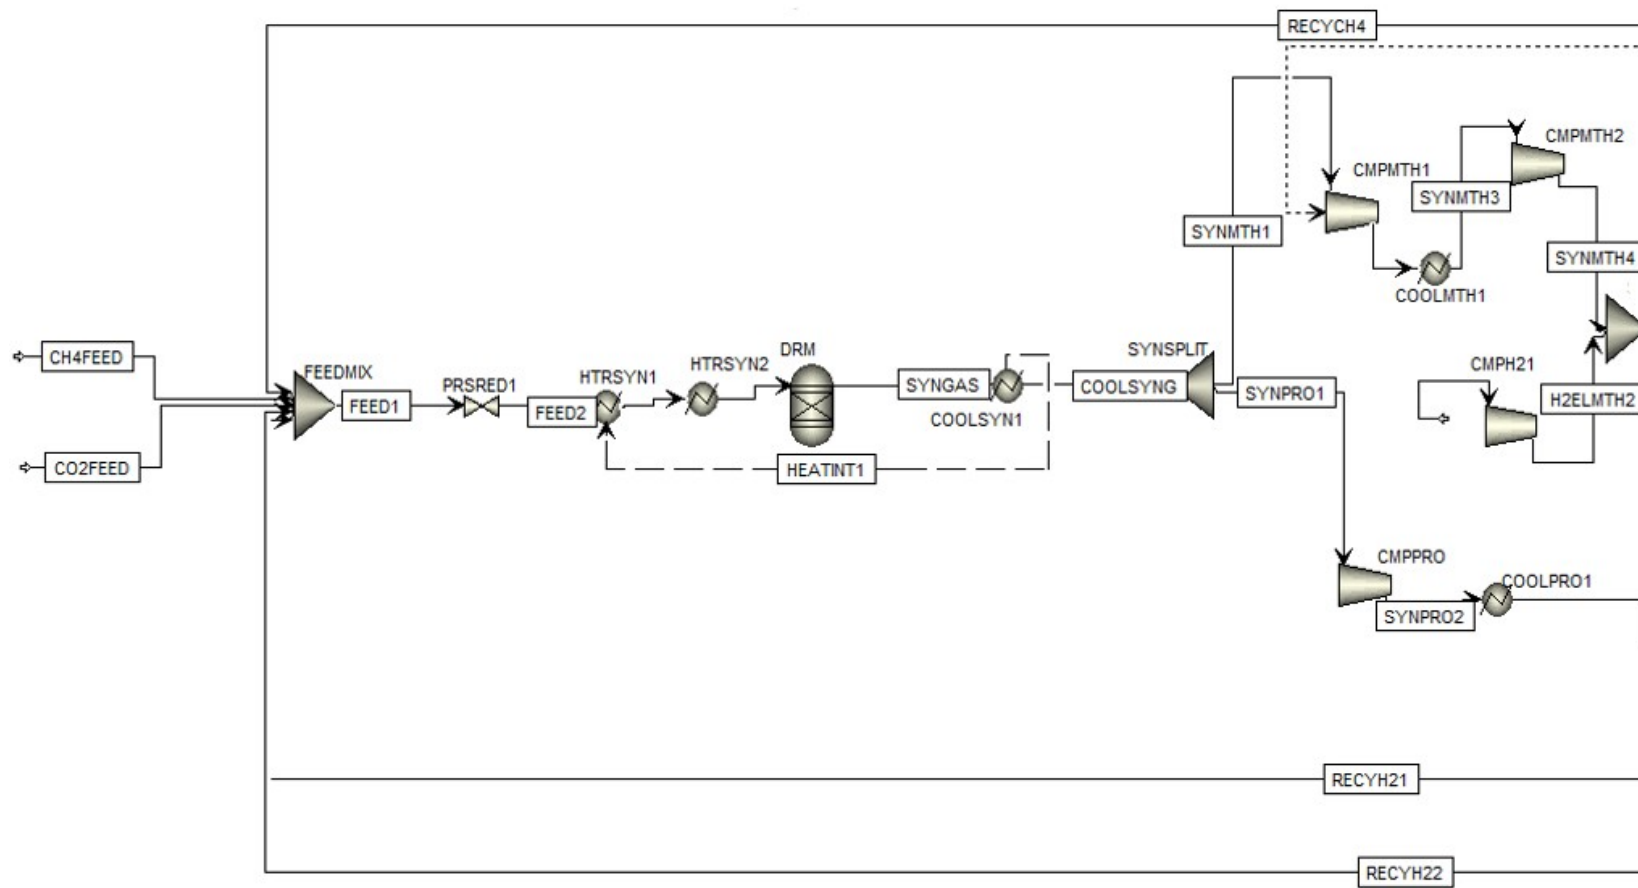

Figure 7. Process flow diagram for syngas production and common steps for propane and propene production

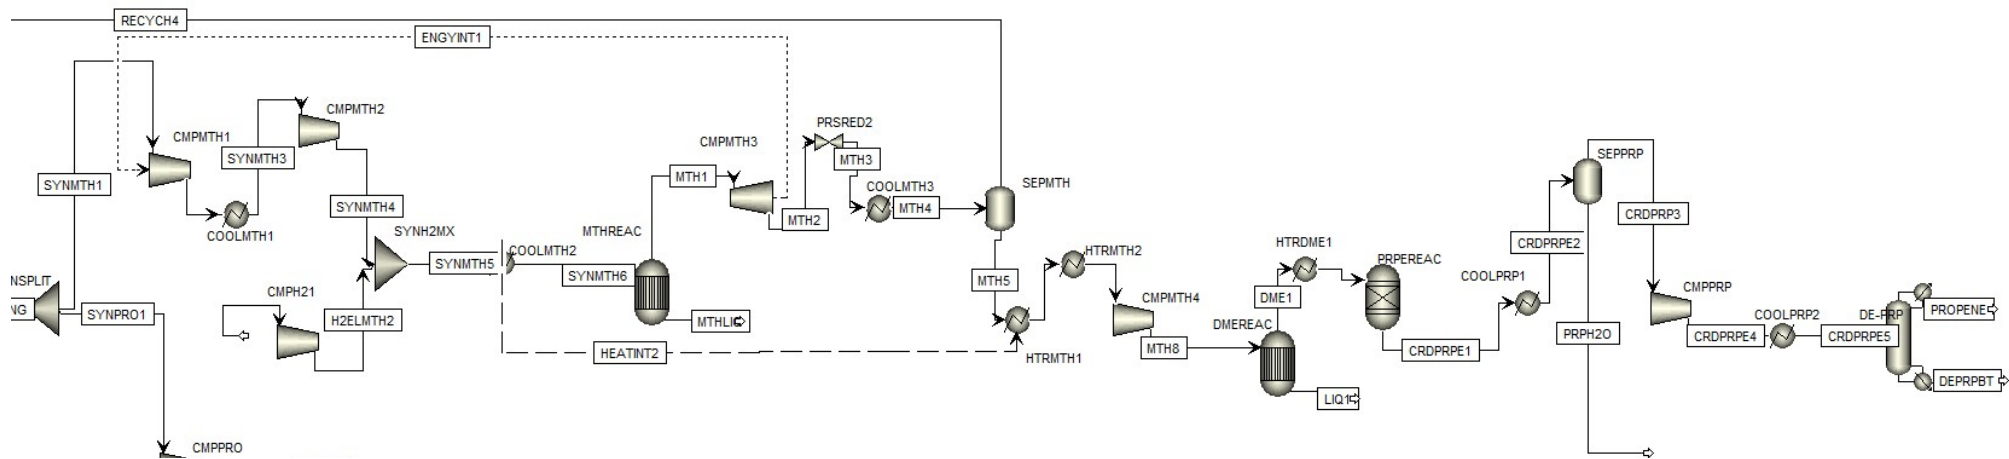

Figure 8. Process flow diagram for propene production



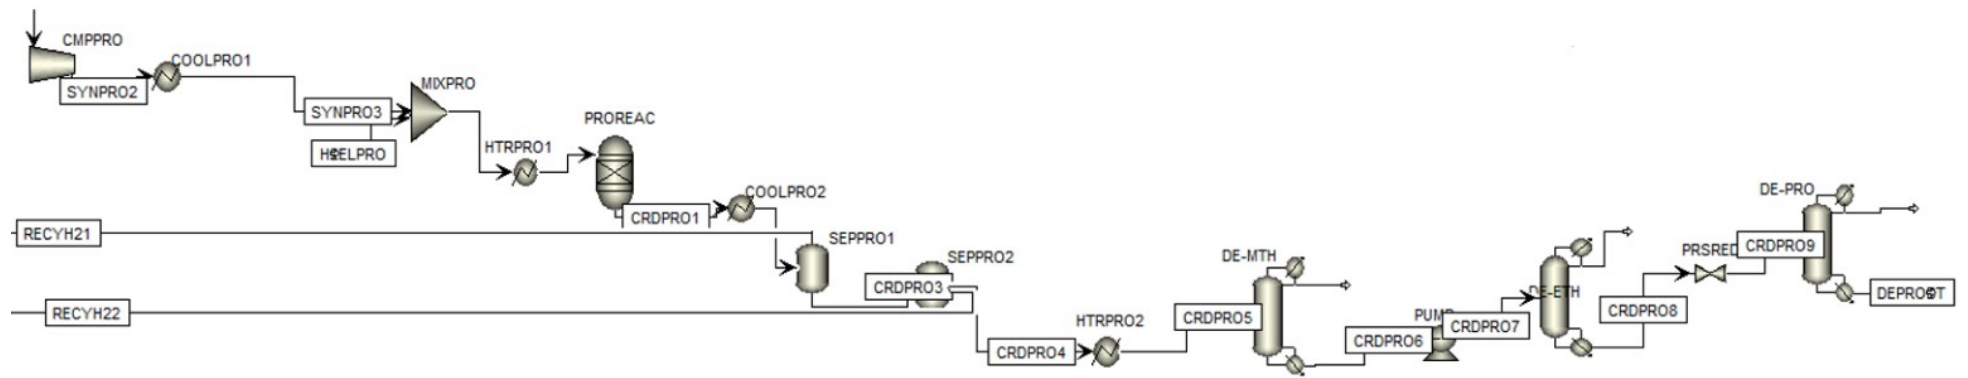

Figure 9. Process flow diagram for propane production

## 24 Carbon capture

Equilibrium reactions (Wang, 2021):

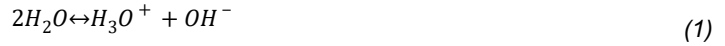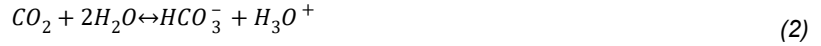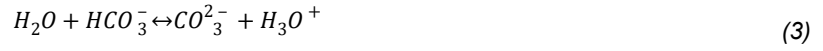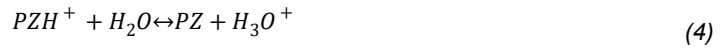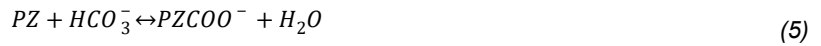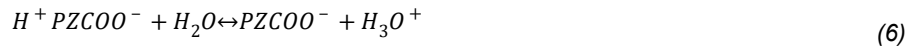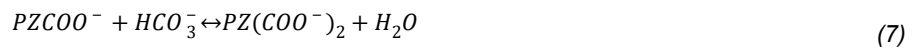

Rate-controlled (Wang, 2021):

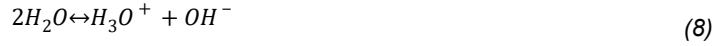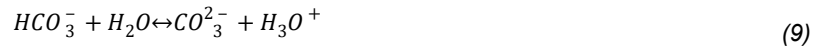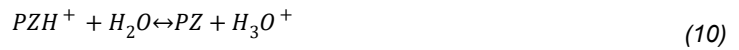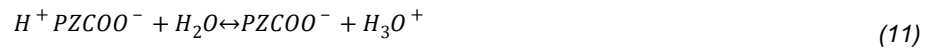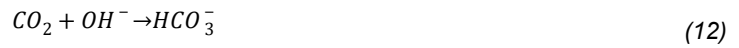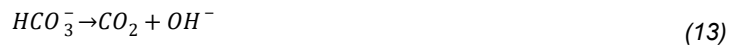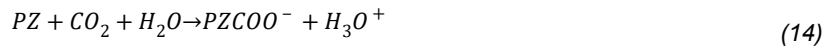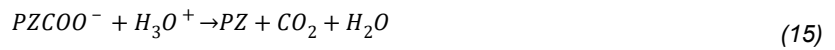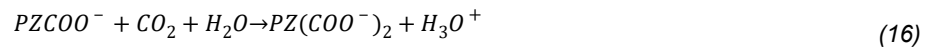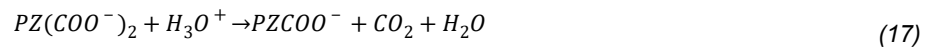

Table 56. Kinetic reaction parameters (Wang, 2021)

| Reaction | Type    | $k_j^0$ (m <sup>3</sup> /kmol.s) | $E_j$ (kJ/kmol) |
|----------|---------|----------------------------------|-----------------|
| 12       | Kinetic | 4.32e+13                         | 5.55e+4         |
| 13       | Kinetic | 2.38e+17                         | 1.23e+5         |
| 14       | Kinetic | 4.14e+10                         | 3.36e+4         |
| 15       | Kinetic | 7.94e+21                         | 6.59e+4         |
| 16       | Kinetic | 3.62e+10                         | 3.36e+4         |
| 17       | Kinetic | 5.56e+25                         | 7.69e+4         |

## 25 Utilities within the chemical plant

Table 57. Power of utilities

| Name                 | Unit           | Utility Type  | Duty         | Unit |
|----------------------|----------------|---------------|--------------|------|
| RCHPUMP              | Pump           | Electrical    | 34,949       | W    |
| HEX1                 | Heat Exchanger | Heating       | 57,229,700   | W    |
| HEX2                 | Heat Exchanger | Heating       | 81,080,600   | W    |
| STRIPPER (Reboiler)  | Distillation   | Heating       | 49,510,000   | W    |
| STRIPPER (Condenser) | Distillation   | Cooling Water | - 45,029,900 | W    |
| HEX3                 | Heat Exchanger | Cooling Water | - 57,229,700 | W    |
| LEANPUMP             | Pump           | Electrical    | 4,884        | W    |
| COOLER               | Heat Exchanger | Cooling Water | - 51,170,000 | W    |
| COOLER2              | Heat Exchanger | Cooling Water | - 18,318,500 | W    |
| HEX4                 | Heat Exchanger | Heating       | 1,213,750    | W    |
| HTRSYN2              | Heat Exchanger | Heating       | 9,211,948    | W    |
| DRM                  | Reactor        | Heating       | 95,423,026   | W    |
| COOLSYN1             | Heat Exchanger | Cooling Water | - 50,936,504 | W    |
| CMPPRO               | Compressor     | Electrical    | 30,135,100   | W    |
| COOLPRO1             | Heat Exchanger | Refrigeration | - 25,758,796 | W    |
| HTRPRO1              | Heat Exchanger | Heating       | 5,709,128    | W    |
| PROREAC              | Reactor        | Cooling Water | - 210,146    | W    |
| COOLPRO2             | Heat Exchanger | Refrigeration | - 21,548,600 | W    |
| HTRPRO2              | Heat Exchanger | Refrigeration | - 561,795    | W    |
| DE-MTH (Reboiler)    | Distillation   | Heating       | 3,798,970    | W    |
| DE-MTH (Condenser)   | Distillation   | Refrigeration | - 259,279    | W    |
| PUMP                 | Pump           | Electrical    | 22,603       | W    |
| DE-ETH (Reboiler)    | Distillation   | Heating       | 5,187,290    | W    |
| DE-ETH (Condenser)   | Distillation   | Refrigeration | - 3,875,810  | W    |
| DE-PRO (Reboiler)    | Distillation   | Heating       | 3,763,390    | W    |
| DE-PRO (Condenser)   | Distillation   | Cooling Water | - 4,434,360  | W    |
| COOLMTH1             | Heat Exchanger | Refrigeration | - 8,671,419  | W    |
| CMPMTH2              | Compressor     | Electrical    | 22,981,303   | W    |
| CMPH21               | Compressor     | Electrical    | 781,924      | W    |
| COOLMTH2             | Heat Exchanger | Cooling Water | - 15,045,922 | W    |
| MTHREAC              | Reactor        | Cooling Water | - 35,535,728 | W    |
| CMPMTH3              | Compressor     | Electrical    | - 1,659,361  | W    |
| COOLMTH3             | Heat Exchanger | Refrigeration | - 16,337,049 | W    |
| HTRMTH2              | Heat Exchanger | Heating       | 1,709,815    | W    |
| CMPMTH4              | Compressor     | Electrical    | 955,207      | W    |
| DMEREAC              | Reactor        | Cooling Water | - 2,884,606  | W    |

|                    |                |               |              |   |
|--------------------|----------------|---------------|--------------|---|
| PRPREAC            | Reactor        | Cooling Water | - 10,903,690 | W |
| HTRDME1            | Heat Exchanger | Heating       | 2,860,464    | W |
| COOLPRP1           | Heat Exchanger | Refrigeration | - 22,984,909 | W |
| CMPPRP             | Compressor     | Electrical    | 965,967      | W |
| COOLPRP2           | Heat Exchanger | Cooling Water | - 1,527,403  | W |
| DE-PRP (Reboiler)  | Distillation   | Heating       | 837,587      | W |
| DE-PRP (Condenser) | Distillation   | Cooling Water | 1,339,110    | W |

## 26 Cooling tower calculations

Makeup water (Perry et al., 1997):

$$Evaporation\ loss = 0.00085 * W_c * (T_1 - T_2) \quad (18)$$

Where  $W_c$  is water flowrate, temperature is for inlet and outlet water.

$$Drift\ loss = W_c * 0.002 \quad (19)$$

$$Blowdown = \frac{Evaporation\ loss}{(Cycles - 1)} \quad (20)$$

Typically, cooling towers are operated with between three and five cycles.

## 27 Operating costs

Table 58. Operating costs

| Component              | Fraction of total raw material and utility cost |
|------------------------|-------------------------------------------------|
| Operating labour cost  | 0.05                                            |
| Maintenance cost       | 0.01                                            |
| Operating cost         | 0.01                                            |
| Plant overhead cost    | 0.03                                            |
| General and admin cost | 0.09                                            |

## 28 Carbon tax sensitivity

Table 59. Carbon tax sensitivity

| Price (\$/ton) | Carbon Revenue (\$/yr) | VP2      | VP            | NPV              | Payback  |
|----------------|------------------------|----------|---------------|------------------|----------|
| 0              | 0                      | 2,123.55 | 13,366,017.64 | - 695,557,394.13 | -0.77488 |
| 25             | 11,326,392             | 3,553.65 | 24,692,409.64 | - 521,442,987.80 | -0.9141  |
| 50             | 22,652,784             | 4,983.75 | 36,018,801.64 | - 347,328,581.47 | -1.11431 |
| 75             | 33,979,176             | 6,413.85 | 47,345,193.64 | - 173,214,175.14 | -1.42682 |
| 100            | 45,305,568             | 7,843.95 | 58,671,585.64 | 900,231.19       | -1.98293 |
| 99.87074143    | 45,247,007             | 7,836.55 | 58,613,024.31 | 0.00             | -1.97894 |

## References

- Adewuyi, Y. G., Klocke, D. J. & Buchanan, J. S. (1995). Effects of High-Level Additions of ZSM-5 to a Fluid Catalytic Cracking (FCC) RE-USY Catalyst. *Applied Catalysis A: General*, 131(1), 121-133.
- Ahmed, A. (2019). Drilling Fluids; Types, Formation Choice and Environmental Impact. *International Journal of Latest Technology in Engineering, Management & Applied Science*. 8(12), 66-71.
- Al-Mamoori, A., Krishnamurthy, A., Rownaghi, A. A. & Rezaei, F. (2017). Carbon Capture and Utilization Update. *Energy Technology*, 5(6), 834–849.
- Bird Fuels (2020). Propane - All you need to know. Available: <https://birdfuels.ca/propane-all-you-need-to-know/>. Accessed 13/02/2023.
- Boltz, M., Losch, P. & Louis, B. (2014). A General Overview on the Methanol to Olefins Reaction: Recent Catalyst Developments. *Advanced Chemistry Letters*, 1(3), 247–256.
- Britannica (2019). Major oil-producing countries. Available: <https://www.britannica.com/science/petroleum/Major-oil-producing-countries>. Last accessed 07/04/2022.
- Campbell, A. (2018). Barrels of oil equivalent. Available: [https://energyeducation.ca/encyclopedia/Barrels\\_of\\_oil\\_equivalent](https://energyeducation.ca/encyclopedia/Barrels_of_oil_equivalent). Last accessed 15/01/2021.
- Chen, Q., Dunn, J. B. & Allen, D. T. (2019). Greenhouse Gas Emissions of Transportation Fuels from Shale Gas-Derived Natural Gas Liquids. *Procedia CIRP*, 80, 346–351.
- Corma, A., Corresa, E., Mathieu, Y., Sauvanaud, L., Al-Bogami, S., Al-Ghrami, M.S., Bourane, A. (2017). Crude oil to chemicals: light olefins from crude oil. *Catalysis Science & Technology*, 7, 12–46.
- Corsaro, T. Wiltowski, D. Juchelkova & S. Honus (2014) Conversion of Syngas to LPG and Aromatics Over Commercial Fischer-Tropsch Catalyst and HZSM-5 in a Dual Bed Reactor. *Petroleum Science and Technology*, 32:20, 2497-2505.
- Dean, C. (2013). Naphtha catalytic cracking for propylene production. Digital Refining. Available: <https://www.digitalrefining.com/article/1000787/naphtha-catalytic-cracking-for-propylene-production>. Last accessed 10/03/2022.
- DieselNet. (2009). United States: Diesel Fuel. Available: <https://dieselnet.com/standards/us/fuel.php>. Last accessed 15/01/2022.
- Dieterich, V., Buttler, A., Hanel, A., Spliethoff, H. & Fendt, S. (2020). Power-to-Liquid via Synthesis of Methanol, DME or Fischer–Tropsch-Fuels: A Review. *Energy and Environmental Science*, 13(10), 3207–3252.
- Dimian, A. C. & Bildea, C. S. (2018). Energy Efficient Methanol-to-Olefins Process. *Chemical Engineering Research and Design*, 131, 41–54.
- Dimitriou, I., García-Gutiérrez, P., Elder, R. H., Cuéllar-Franca, R. M., Azapagic, A. & Allen, R. W. K. (2015). Carbon Dioxide Utilisation for Production of Transport Fuels: Process and Economic Analysis. *Energy and Environmental Science*, 8(6), 1775–1789.

- Djimasbe, R., Al-Muntaser, A. A., Suwaid, M. A. & Varfolomeev, M. A. (2019). Comparison of Upgrading of Heavy Oil and Vacuum Distillation Residues by Supercritical Water, IOP Conference Series: Earth and Environmental Science. Institute of Physics Publishing, 282, 012044.
- Dry, M. E. (2002). The Fischer-Tropsch Process: 1950-2000. *Catalysis Today*, 71, 227-241.
- EEA. (2016). EMEP/EEA air pollutant emission inventory guidebook 2019. Technical guidance to prepare national emission inventories. ISSN: 1977-844.
- EPA. (2019). Greenhouse Gas Reporting Program (GHGRP). Available: <https://www.epa.gov/ghgreporting/ghgrp-petroleum-and-natural-gas-systems>. Last accessed 30/01/2022.
- Er-Rbib, H., Bouallou, C. & Werkoff, F. (2012). Production of Synthetic Gasoline and Diesel Fuel from Dry Reforming of Methane, *Energy Procedia*, 29, 156–165.
- Gangadharan, P., Kanchi, K. C. & Lou, H. H. (2012). Evaluation of the Economic and Environmental Impact of Combining Dry Reforming with Steam Reforming of Methane. *Chemical Engineering Research and Design*, 90(11), 1956–1968.
- Garcia-Garcia, G., Fernandez, M. C., Armstrong, K., Woolass, S. & Styring, P. (2021). Analytical Review of Life-Cycle Environmental Impacts of Carbon Capture and Utilization Technologies. *ChemSusChem*, 14, 995– 101.
- Guettel, R., Kunz, U. & Turek, T. (2008). Reactors for Fischer-Tropsch Synthesis. *Chemical Engineering and Technology*, 31(5), 746–754.
- Guil-López, R., Mota, N., Llorente, J., Millán, E., Pawelec, B., Fierro, J. L. G. & Navarro, R. M. (2019). Methanol Synthesis from CO<sub>2</sub>: A Review of the Latest Developments in Heterogeneous Catalysis. *Materials*, 12(23), 3902.
- Haszeldine, R. (2009). Carbon Capture and Storage: How Green Can Black Be?. *Science*. 325(5948), 1647-1652.
- Hong, J. (2018). C–H Bond Carboxylation with Carbon Dioxide. *ChemSusChem*. 12 (1), 6-39.
- Hull, C. (2009). GHG Lifetimes and GWPs. For ozone-depleting substances and their replacements. Available: [https://climatechangeconnection.org/wp-content/uploads/2014/08/GWP\\_AR4.pdf](https://climatechangeconnection.org/wp-content/uploads/2014/08/GWP_AR4.pdf). Last accessed 08/02/2022.
- IANGV. (N.D.). Natural Gas. Available: <https://www.iangv.org/natural-gas-vehicles/natural-gas>. Last accessed 16/01/2022.
- IHS Markit. (2019). Propylene. *Chemical Economics Handbook*. Available: <https://ihsmarkit.com/products/propylene-chemical-economics-handbook.html>. Last accessed 10/05/2022.
- IMARC (2022). Propane Market: Global Industry Trends, Share, Size, Growth, Opportunity and Forecast 2022-2027. Available: <https://www.imarcgroup.com/propane-market>. Last accessed 13/02/2023.
- IPCC (2005). Sources of CO<sub>2</sub>. IPCC Special Report on Carbon dioxide Capture and Storage. Available: [https://www.ipcc.ch/site/assets/uploads/2018/03/srccs\\_chapter2-1.pdf](https://www.ipcc.ch/site/assets/uploads/2018/03/srccs_chapter2-1.pdf). Last accessed 24/01/2022.

- Jasper, S. & El-Halwagi, M. M. (2015). A Techno-Economic Comparison between Two Methanol-to-Propylene Processes. *Processes*, 3(3), 684–698.
- Jia, F. R., Jing, W. T., Liu, G. X., Yue, Q., Wang, H. M. & Shi, L. (2020). Paraffin-Based Crude Oil Refining Process Unit-Level Energy Consumption and CO<sub>2</sub> Emissions in China. *Journal of Cleaner Production*, 255, 120347.
- Kapteijn, F. & Moulijn, J. A. (2020). Structured Catalysts and Reactors – Perspectives for Demanding Applications. *Catalysis Today*, 383, 5-14.
- Karamé, I. (2018). Carbon Dioxide Conversion to Methanol: Opportunities and Fundamental Challenges. In: Shaya, J. Hassan, S. Carbon Dioxide Chemistry, Capture and Oil Recovery. London: Intech. 41-63. ISBN: 978-1-78923-575-3.
- Keller, F., Lee, R. P. & Meyer, B. (2020). Life Cycle Assessment of Global Warming Potential, Resource Depletion and Acidification Potential of Fossil, Renewable and Secondary Feedstock for Olefin Production in Germany. *Journal of Cleaner Production*, 250, 119484.
- Khoo, H. H., Halim, I. & Handoko, A. D. (2020). LCA of Electrochemical Reduction of CO<sub>2</sub> to Ethylene. *Journal of CO<sub>2</sub> Utilization*, 41, 101229.
- Krylova, A. Y. (2014). Products of the Fischer-Tropsch Synthesis (A Review). *Solid Fuel Chemistry*, 48(1), 22–35.
- Kutz, M. (2017). *Applied Plastics Engineering Handbook - Processing, Materials, and Applications (2nd Edition) - 2.1.2.1 Steam Cracking.* (pp. 27-29). Elsevier. ISBN: 978-0-323-39040-8.
- Kuwayama, Y. (2015). Water Quality and Quantity Impacts of Hydraulic Fracturing. *Current Sustainable/Renewable Energy Reports*, 2(1), 17-24.
- Lavoie, J. M. (2014). Review on Dry Reforming of Methane, a Potentially More Environmentally-Friendly Approach to the Increasing Natural Gas Exploitation. *Frontiers in Chemistry*, 2(81).
- Lee, D. Y. & Elgowainy, A. (2018). By-Product Hydrogen from Steam Cracking of Natural Gas Liquids (NGLs): Potential for Large-Scale Hydrogen Fuel Production, Life-Cycle Air Emissions Reduction, and Economic Benefit. *International Journal of Hydrogen Energy*, 43(43), 20143–20160.
- Liu, Y., Kamata, H., Ohara, H., Izumi, Y., Ong, D. S. W., Chang, J., Poh, C. K., Chen, L. & Borgna, A. (2020). Low-Olefin Production Process Based on Fischer-Tropsch Synthesis: Process Synthesis, Optimization, and Techno-Economic Analysis. *Industrial and Engineering Chemistry Research*, 59(18), 8728–8739.
- Maddah, H.A. (2018). A Comparative Study between Propane Dehydrogenation (PDH) Technologies and Plants in Saudi Arabia. *American Scientific Research Journal for Engineering, Technology, and Sciences*, 45 (1), 49-63.
- Marsh, M., Wery, J. (2019). On-purpose propylene production. *Digital Refining*. Available: <https://www.digitalrefining.com/article/1002264/on-purpose-propylene-production>. Accessed 13/02/2023.
- Maverick Engineering (2020). Oil & Gas: Natural Gas Processing: NGL Processing. Available: <https://www.maveng.com/index.php/business-streams/oil-gas/natural-gas-processing/ngl-extraction-fractionation>. Last accessed 17/01/2022.

Mercuria. (2015). Vacuum gas oil. Vacuum gas oil. Available: [http://www.mercuria.com/sites/default/files/EN\\_SDS\\_Vacuum%20gas%20oil%20HFO\\_\\_SDS%20SGS%20GHS%20%28Reach%20ANNEXII%29\\_2015130\\_MERCURIA-03\\_NR\\_\\_0.pdf](http://www.mercuria.com/sites/default/files/EN_SDS_Vacuum%20gas%20oil%20HFO__SDS%20SGS%20GHS%20%28Reach%20ANNEXII%29_2015130_MERCURIA-03_NR__0.pdf). Last accessed 19/01/2022.

Moretti, C. (2020). Environmental life cycle assessment of polypropylene made from used cooking oil. *Resources, Conservation and Recycling*. 157 (8), 1-13.

Mozyr Oil Refinery. (N.D.). Hydrotreated vacuum gas oil. Available: <https://mnpz.by/en/products/hydrotreated-vacuum-gas-oil>. Last accessed 19/01/2022.

NETL. (2014). Life Cycle Analysis of Natural Gas Extraction and Power Generation. DOE/NETL-2014/1646. Available: [https://www.energy.gov/sites/prod/files/2019/09/f66/Life%20Cycle%20Analysis%20of%20Natural%20Gas%20Extraction%20and%20Power%20Generation%2005\\_29\\_14%20NETL.pdf](https://www.energy.gov/sites/prod/files/2019/09/f66/Life%20Cycle%20Analysis%20of%20Natural%20Gas%20Extraction%20and%20Power%20Generation%2005_29_14%20NETL.pdf). Last accessed 03/01/2022.

NETL (2020). Pre-combustion CO<sub>2</sub> capture. Available: <https://netl.doe.gov/coal/carbon-capture/pre-combustion>. Last accessed 07/01/2022.

Nexant (2018). TECH Report 2018-4: Propylene.

Nimana, B., Canter, C. & Kumar, A. (2015). Life Cycle Assessment of Greenhouse Gas Emissions from Canada's Oil Sands-Derived Transportation Fuels. *Energy*, 88, 544–554.

Norwegian Petroleum Directorate (2020). Conversion factors. Available: <https://www.npd.no/en/about-us/information-services/conversion-table/>. Last accessed 15/01/2022.

Nwaoha, C. (2017). Heat duty, heat of absorption, sensible heat and heat of vaporization of 2–Amino–2–Methyl–1–Propanol (AMP), Piperazine (PZ) and Monoethanolamine (MEA) tri-solvent blend for carbon dioxide (CO<sub>2</sub>) capture. *Chemical Engineering Science*. 170 (4), 26-35.

Oyama, S. T., Hacıoğlu, P., Gu, Y. & Lee, D. (2012). Dry Reforming of Methane Has No Future for Hydrogen Production: Comparison with Steam Reforming at High Pressure in Standard and Membrane Reactors. *International Journal of Hydrogen Energy*, 37(13), 10444–10450.

Parsapur, R. K., Chatterjee, S. & Huang, K. W. (2020). The Insignificant Role of Dry Reforming of Methane in CO<sub>2</sub> emission Relief. *ACS Energy Letters*, 5(9), 2881–2885.

Patterson, B. D., Mo, F., Borgschulte, A., Hillestad, M., Joos, F., Kristiansen, T., Sunde, S. & van Bokhoven, J. A. (2019). Renewable CO<sub>2</sub> Recycling and Synthetic Fuel Production in a Marine Environment. *Proceedings of the National Academy of Sciences of the United States of America*, 116(25), 12212–12219.

Perry, R. H., Green, D. W. & Maloney, J. O. (1997). *Perry's Chemical Engineers' Handbook*. McGraw-Hill. ISBN-13: 978-0071422949.

PRNewswire. (2020). 2020 Global Ethylene Market and Propylene Industry Research Analysis by TBRC. Available: <https://www.prnewswire.com/news-releases/2020-global-ethylene-market-and-propylene-industry-research-analysis-by-tbrc-301014325.html>. Last accessed 10/05/2022.



PubChem. (2020). Propylene. Available: <https://pubchem.ncbi.nlm.nih.gov/compound/Propylene>. Last accessed 23/03/2022.

Rahman, M. (2015). Well-to-wheel life cycle assessment of transportation fuels derived from different North American conventional crudes. *Applied Energy*, 156(10), 159-173.

Rahman, M. M., Canter, C. & Kumar, A. (2014). Greenhouse Gas Emissions from Recovery of Various North American Conventional Crudes. *Energy*, 74, 607–617.

Raj, R., Ghandehariun, S., Kumar, A. & Linwei, M. (2016). A Well-to-Wire Life Cycle Assessment of Canadian Shale Gas for Electricity Generation in China. *Energy*, 111, 642–652.

Ren, T., Patel, M. & Blok, K. (2006). Olefins from Conventional and Heavy Feedstocks: Energy Use in Steam Cracking and Alternative Processes. *Energy*, 31(4), 425–451.

Ren, T., Patel, M. K. & Blok, K. (2008). Steam Cracking and Methane to Olefins: Energy Use, CO<sub>2</sub> Emissions and Production Costs. *Energy*, 33(5), 817–833.

Sapkota, K., Oni, A. O. & Kumar, A. (2018). Techno-Economic and Life Cycle Assessments of the Natural Gas Supply Chain from Production Sites in Canada to North and Southwest Europe. *Journal of Natural Gas Science and Engineering*, 52, 401–409.

Siddiqui, M. A. B., Aitani, A. M., Saeed, M. R., Al-Yassir, N. & Al-Khattaf, S. (2011). Enhancing Propylene Production from Catalytic Cracking of Arabian Light VGO over Novel Zeolites as FCC Catalyst Additives. *Fuel*, 90(2), 459–466.

Sleeswijk, A. W., van Oers, L. F. C. M., Guinée, J. B., Struijs, J. & Huijbregts, M. A. J. (2008). Normalisation in Product Life Cycle Assessment: An LCA of the Global and European Economic Systems in the Year 2000. *Science of the Total Environment*, 390(1), 227–240.

Speight, J. (2007). *Natural Gas - A Basic Handbook*. 5.2 Natural Gas. Gulf Publishing Company. ISBN-13: 978-0128095706.

Statista (2023). Production capacity of propylene worldwide in 2018 and 2020. Available: <https://www.statista.com/statistics/1065879/global-propylene-production-capacity/>. Last accessed 13/02/2023.

Stratiev, D. S., Shishkova, I. K. & Dobrev, D. S. (2012). Fluid Catalytic Cracking Feed Hydrotreatment and Its Severity Impact on Product Yields and Quality. *Fuel Processing Technology*, 94(1), 16–25.

Sun, P., Elgowainy, A., Wang, M., Han, J. & Henderson, R. J. (2018). Estimation of U.S. Refinery Water Consumption and Allocation to Refinery Products. *Fuel*, 221, 542–557.

Sun, P., Young, B., Elgowainy, A., Lu, Z., Wang, M., Morelli, B. & Hawkins, T. (2019). Supporting Information Criteria Air Pollutant and Greenhouse Gases Emissions from U.S. Refineries Allocated to Refinery Products. *Environmental Science & Technology*, 53(11), 6556–6569.

The Engineering Toolbox. (2005). Fuel Gases Heating Values. Available: [https://www.engineeringtoolbox.com/heating-values-fuel-gases-d\\_823.html](https://www.engineeringtoolbox.com/heating-values-fuel-gases-d_823.html). Last accessed 19/01/2022.

The Engineering Toolbox. (N.D.). Fossil and Alternative Fuels - Energy Content. Available: [https://www.engineeringtoolbox.com/fossil-fuels-energy-content-d\\_1298.html](https://www.engineeringtoolbox.com/fossil-fuels-energy-content-d_1298.html). Last accessed 17/01/2022.

Tong, F. (2015). Comparison of Life Cycle Greenhouse Gases from Natural Gas Pathways for Medium and Heavy-Duty Vehicles. *Environmental Science & Technology*, 49(12), 7123-7133.

U.S. EIA. (2020a). Monthly Energy Review. Available: <https://www.eia.gov/totalenergy/data/monthly/>. Last accessed 30/01/2022.

U.S. EIA. (2020b). Natural Gas Plant Field Production. Available: [https://www.eia.gov/dnav/pet/pet\\_pnp\\_gp\\_dc\\_nus\\_mbbbl\\_a.htm](https://www.eia.gov/dnav/pet/pet_pnp_gp_dc_nus_mbbbl_a.htm). Last accessed 30/01/2022.

U.S. EPA. (1996). 3.4 Large Stationary Diesel and All Stationary Dual-fuel Engines. Available: <https://www3.epa.gov/ttnchie1/ap42/ch03/final/c03s04.pdf>. Last accessed 15/01/2022.

U.S. EPA. (2015). AP 42, Fifth Edition, Volume I Chapter 5: Petroleum Industry. Available: [https://www3.epa.gov/ttn/chie/ap42/ch05/final/c05s01\\_2015.pdf](https://www3.epa.gov/ttn/chie/ap42/ch05/final/c05s01_2015.pdf). Last accessed 06/01/2022.

Unitrove. (N.D.). Natural Gas Density Calculator. Available: <https://www.unitrove.com/engineering/tools/gas/natural-gas-density>. Last accessed 16/01/2022.

University of Michigan. (2020). Unconventional Fossil Fuels Factsheet. Center for Sustainable Systems. Pub. No. CSS13-19. Available: <http://css.umich.edu/factsheets/unconventional-fossil-fuels-factsheet>. Last accessed 30/01/2022.

Von der Assen, N., Jung, J. & Bardow, A. (2013). Life-Cycle Assessment of Carbon Dioxide Capture and Utilization: Avoiding the Pitfalls. *Energy and Environmental Science*, 6(9), 2721–2734.

Vora, B.V., Marker, T.L., Barger, P.T., Nilsen, H.R., Kvisle, S. & Fuglerud, T. (1997). Economic route for natural gas conversion to ethylene and propylene. *Studies in Surface Science and Catalysis*, 107, 87-98.

Wang, M. (2004). Allocation of energy use in petroleum refineries to petroleum products. *The International Journal of Life Cycle Assessment*, 9(5), 33-44.

Wang, M. (2021), Lab Notes, CPE450 Advanced Process Modelling, Simulation and Optimisation, The University of Sheffield.

Weber, C. (2012). Life Cycle Carbon Footprint of Shale Gas: Review of Evidence and Implications. *Environmental Science & Technology*, 46(11), 5688-5695.

World Petroleum Council (2020). Petroleum refining - Courtesy of AIP. Available: <https://www.world-petroleum.org/technology/203-petroleum-refining-courtesy-of-aip>. Last accessed 06/01/2022.

Wypych, G. & Wypych, A. (2019). Databook of Solvents (2nd Edition) - Propane. ChemTec Publishing. ISBN: 978-1-895198-66-9.

Xiang, D., Yang, S., Li, X. & Qian, Y. (2015). Life Cycle Assessment of Energy Consumption and GHG Emissions of Olefins Production from Alternative Resources in China. *Energy Conversion and Management*, 90, 12–20.

Yao, B., Xiao, T., Makgae, O. A., Jie, X., Gonzalez-Cortes, S., Guan, S., Kirkland, A. I., Dilworth, J. R., Al-Megren, H. A., Alshihri, S. M., Dobson, P. J., Owen, G. P., Thomas, J. M. & Edwards, P. P. (2020). Transforming Carbon Dioxide into Jet Fuel Using an Organic Combustion-Synthesized Fe-Mn-K Catalyst. *Nature Communications*, 11(1).

Youngsub, L., Chul-Jin, L., Yeong, S.J., Song, I.H., Lee, C.H., & Han, C. (2012). Optimal Design and Decision for Combined Steam Reforming Process with Dry Methane Reforming to Reuse CO<sub>2</sub> as a Raw Material. *Industrial & Engineering Chemistry Research*, 51(13), 4982–4989.

Zheng, L. (2014). Corrosion Benefits of Piperazine As an Alternative CO<sub>2</sub> Capture Solvent. *Industrial & Engineering Chemistry Research*. 53 (53), 1-12.

Zhou, H., Yang, Q., Zhu, S., Song, Y. & Zhang, D. (2019). Life Cycle Comparison of Greenhouse Gas Emissions and Water Consumption for Coal and Oil Shale to Liquid Fuels. *Resources, Conservation and Recycling*, 144, 74–81.
